# Supplementary material for: Dirhodium(ii)-catalyzed ortho C–H amination of sterically congested N,N-dialkylanilines
Source: Royal Society of Chemistry journal article supplement (doi:10.1039/c8ob01974f), 2018-01-01
Supplement: c8ob01974f1.pdf [file c8ob01974f1.pdf]

## Electronic Supplementary Information

### **Dirhodium(II)-Catalyzed *ortho* C–H Amination of Sterically Congested *N,N*-Dialkylanilines**

Motoki Ito,<sup>\*</sup> Tomoya Nakagawa, Kazuhiro Higuchi and Shigeo Sugiyama<sup>\*</sup>

*Meiji Pharmaceutical University, 2-522-1 Noshio Kiyose, Tokyo 204-8588, Japan*

|                                                                                                                                     |            |
|-------------------------------------------------------------------------------------------------------------------------------------|------------|
| <b>1. Competition experiments between C–H amination products and 1d</b>                                                             | <b>S4</b>  |
| <b>2. KIE experiment between 1d and [D<sub>4</sub>]-1d</b>                                                                          | <b>S5</b>  |
| <b>3. Synthesis of chiral tetrahydroquinoxaline 15 and 1,5-benzodiazepine 16</b>                                                    | <b>S5</b>  |
| <b>4. General procedure for the preparation of <i>N</i>-alkyl-<i>N</i>-(1-phenylethyl)anilines</b>                                  | <b>S6</b>  |
| <b>5. Procedure for the preparation of (<i>R</i>)-<i>N</i>-isopropyl-<i>N</i>-(1-oxopropan-2-yl)-<i>p</i>-toluidines</b>            | <b>S9</b>  |
| <b>6. Typical procedure for Rh(II)-catalyzed <i>ortho</i> C–H amination of <i>N,N</i>-dialkylanilines</b>                           | <b>S11</b> |
| <b>7. Rh(II)-catalyzed C(sp<sup>2</sup>)–H amination of <i>N,N</i>-diisopropylaniline (1v)</b>                                      | <b>S21</b> |
| <b>8. Typical procedure for Rh(II)-catalyzed <i>ortho</i> C–H amination of <i>papa</i>-unsubstituted <i>N,N</i>-dialkylanilines</b> | <b>S23</b> |
| <b>9. Competition experiments between <i>N,N</i>-diisopropyl-4-bromoaniline (1d) and 1,3,5-triisopropylbenzene (10)</b>             | <b>S24</b> |
| <b>10. Procedure for the synthesis of tetrahydroquinoxaline 15</b>                                                                  | <b>S26</b> |
| <b>11. Procedure for the synthesis of 1,5-benzodiazepine 16</b>                                                                     | <b>S27</b> |

## Experimental Section

**General.** All melting points were measured on a Yanagimoto micro melting point apparatus. IR spectra were recorded on a JASCO FT/IR-4100 spectrometer and absorbance bands are reported in wavenumber ( $\text{cm}^{-1}$ ).  $^1\text{H}$  NMR spectra were recorded on a JEOL JNM-AL 300 (300 MHz) spectrometer or a JEOL JNM-ECA 400 (400 MHz) spectrometer. Chemical shifts are reported relative to internal standard (tetramethylsilane at  $\delta_{\text{H}}$  0.00,  $\text{CDCl}_3$  at  $\delta_{\text{H}}$  7.26,  $\text{CD}_3\text{OD}$  at  $\delta_{\text{H}}$  3.34,  $\text{CD}_3\text{CN}$  at  $\delta_{\text{H}}$  1.96). Data are presented as follows: chemical shift ( $\delta$ , ppm), multiplicity (s = singlet, d = doublet, t = triplet, q = quartet, m = multiplet), coupling constant and integration.  $^{13}\text{C}$  NMR spectra were recorded on a JEOL JNM-ECA 400 (100 MHz) spectrometer. Chemical shifts are reported relative to internal standard ( $\text{CDCl}_3$  at  $\delta$  77.00,  $\text{CD}_3\text{CN}$  at  $\delta$  1.79 and 118.26). Mass spectra were recorded on a JEOL JMS 700 instrument with a direct inlet system. Column chromatography was carried out on Kanto silica gel 60 N (40–50 mesh). Analytical thin layer chromatography (TLC) was carried out on Merck Kieselgel 60 F<sub>254</sub> plates with visualization by ultraviolet, anisaldehyde stain solution or phosphomolybdic acid stain solution. All non-aqueous reactions were carried out in flame-dried glassware under Ar atmosphere unless otherwise noted. Reagents and solvents were used without purification.  $4\text{\AA}$  MS (powder) from nacalai tesque was used after drying. Dirhodium(II) complex catalysts,  $\text{Rh}_2(\text{esp})_2$  and  $\text{Rh}_2(\text{HNCOCF}_3)_4$ , were prepared according to literatures,<sup>1,2</sup> while  $\text{Rh}_2(\text{esp})_2$  is commercially available. Iminoiodinanes were prepared according to a literature.<sup>3</sup> *N,N*-Diisopropylanilines **1g** and **1w–z** were prepared from corresponding primary anilines by reductive amination with 2-methoxypropene in high yields (>90%).<sup>4</sup> Other *N,N*-diisopropylanilines **1e**, **1f**, **1h**, **1i**, and **1u** were synthesized from **1d**<sup>5</sup> via Pd-catalyzed coupling with organometallic reagents ( $^t\text{BuMgBr}$  for **1e**, phenylboronic acid for **1f**) or halogen-lithium exchange with  $^t\text{BuLi}$  followed by treatment with electrophiles ( $\text{RO}_2\text{CCl}$  for **1h** and **1i**, estrone 3-methyl ether for **1u**).

## 1. Competition experiments between C–H amination products and **1d**

In order to investigate the over-oxidation of *para* amination product **7** formed under the C–H amination conditions, a series of competition experiments was performed. A competition experiment between **7** and **1d** under C–H amination conditions led to dimerization of **7**, while a quantitative amount of **1d** was recovered [eqn (S1)]. Therefore, over-oxidation of **7** proceeded much faster than C–H amination. The formation **S9** was also observed under the conditions using TsN=IPh in the absence of the dirhodium(II) catalyst [eqn (S3)]. Conversely, no detectable degradation of *ortho* amination product **2v** was observed in the competition experiment with **1d** under the same conditions [eqn (S2)]. These results indicate that a bulky amino group with two secondary alkyl groups prevents over-oxidation of *ortho* amination products **2**.

### Scheme S1.

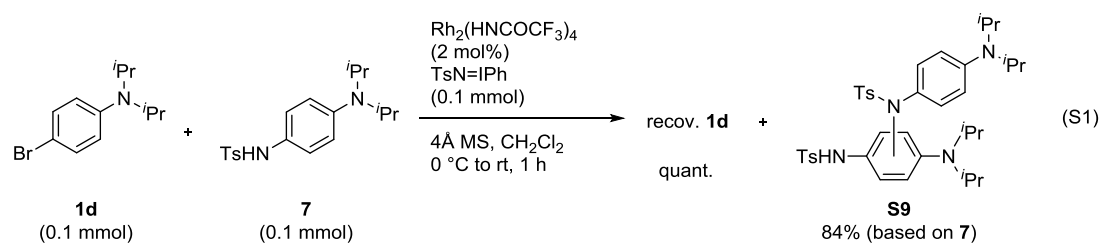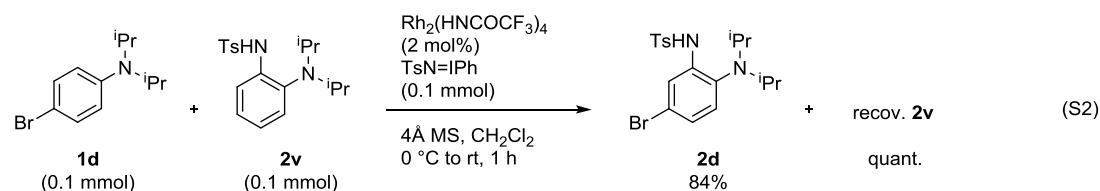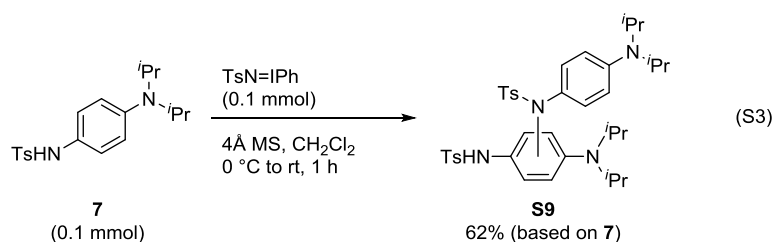

## 2. KIE experiment between **1d** and **[D<sub>4</sub>]-1d**

### Scheme S2.

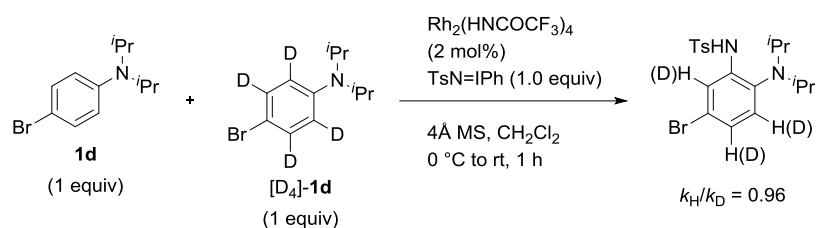

**[D<sub>4</sub>]-1d** was synthesized from commercially available aniline-*d*<sub>7</sub> by reductive amination with 2-methoxypropene<sup>4</sup> followed by treatment with NBS in DMF.<sup>5</sup>

$\text{TsN=IPh}$  (37.3 mg, 0.10 mmol) was added to a stirred mixture of **1d** (25.6 mg, 0.10 mmol), **[D<sub>4</sub>]-1d** (26.0 mg, 0.10 mmol),  $\text{Rh}_2(\text{HNCOCF}_3)_4$  (1.3 mg, 0.002 mmol, 2 mol %) and 4Å MS (powder, 40 mg) in  $\text{CH}_2\text{Cl}_2$  (1.0 mL) at 0 °C under Ar atmosphere. After stirring at room temperature for 1 h, the whole mixture was filtered through a pad of Celite, and the filtrate was evaporated in vacuo to furnish the crude product, which was purified by column chromatography (silica gel, 8:1 *n*-hexane/AcOEt) to give a mixture of **2d** and **[D<sub>4</sub>]-2d** (33.6 mg) with recovery of a mixture of starting materials (32.5 mg). The  $k_{\text{H}}/k_{\text{D}}$  value was determined to be 0.96 by <sup>1</sup>H NMR analysis of the mixture of products (**2d**:**[D<sub>4</sub>]-2d** = 49:51). Ratio of the recovered starting materials **1d** and **[D<sub>4</sub>]-1d** was also determined to be 51:49.

## 3. Synthesis of chiral tetrahydroquinoxaline **15** and 1,5-benzodiazepine **16**

### Scheme S3.

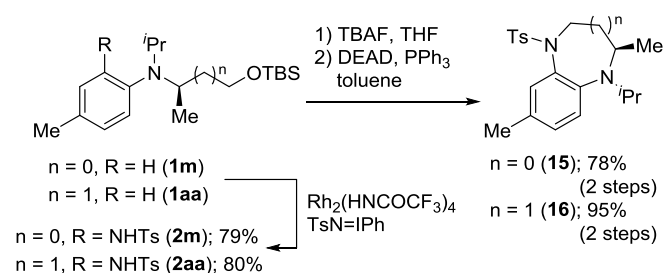

#### 4. General procedure for the preparation of *N*-alkyl-*N*-(1-phenylethyl)anilines

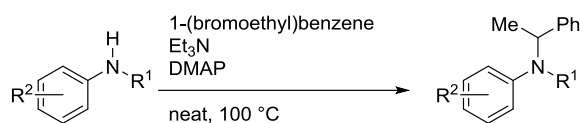

A reaction vessel was equipped with a stirring bar and charged with *N*-alkylaniline (2.0 mmol), (1-bromoethyl)benzene (0.68 mL, 5.0 mmol), Et<sub>3</sub>N (2.0 mL) and DMAP (24.4 mg, 0.20 mmol) before sealing with glass stopper. After heating at 100 °C for 12 h, formed precipitate was suspended in AcOEt, and resulting suspension was filtered through a plug of Celite with AcOEt. The filtrate was evaporated in vacuo to furnish the crude product, which was purified by column chromatography (silica gel) to give *N*-alkyl-*N*-(1-phenylethyl)aniline in 16–75% yield.

#### *N*-Isopropyl-*N*-(1-phenylethyl)-*p*-toluidine (1j)

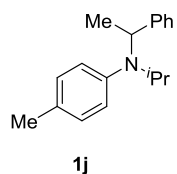

Colorless oil; IR (KBr)  $\nu$  2969, 1515, 1452, 1373, 1262, 1178, 1109, 700 cm<sup>-1</sup>; <sup>1</sup>H NMR (400 MHz, CDCl<sub>3</sub>):  $\delta$  1.07 (d,  $J$  = 6.8 Hz, 3H, CH(CH<sub>3</sub>)<sub>2</sub>), 1.09 (d,  $J$  = 6.8 Hz, 3H, CH(CH<sub>3</sub>)<sub>2</sub>), 1.40 (d,  $J$  = 6.8 Hz, 3H, CH(CH<sub>3</sub>)Ph), 2.25 (s, 3H, ArCH<sub>3</sub>), 3.67 (septet,  $J$  = 6.8 Hz, 1H, CH(CH<sub>3</sub>)<sub>2</sub>), 4.66 (q,  $J$  = 6.8 Hz, 1H, CH(CH<sub>3</sub>)Ph), 6.79 (d,  $J$  = 8.0 Hz, 2H, ArH), 6.98 (d,  $J$  = 8.0 Hz, 2H, ArH), 7.21 (t,  $J$  = 7.6 Hz, 1H, ArH), 7.31 (t,  $J$  = 7.6 Hz, 2H, ArH), 7.42 (d,  $J$  = 7.6 Hz, 2H, ArH); <sup>13</sup>C NMR (100 MHz, CDCl<sub>3</sub>):  $\delta$  19.6 (CH<sub>3</sub>), 20.4 (CH<sub>3</sub>), 20.9 (CH<sub>3</sub>), 48.7 (CH), 55.3 (CH), 122.0 (CH), 126.3 (CH), 127.0 (CH), 128.2 (CH), 128.8 (CH), 129.1 (C), 144.2 (C), 145.5 (C); HRMS (FAB) calcd for C<sub>18</sub>H<sub>23</sub>N [M]<sup>+</sup> 253.1830, found 253.1829.

#### *N*-Isopropyl-*N*-(1-phenylethyl)-4-trifluoromethylaniline (1k)

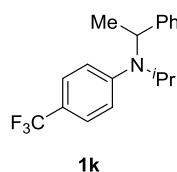

Colorless oil; IR (KBr)  $\nu$  2975, 1613, 1524, 1326, 1108, 825, 703 cm<sup>-1</sup>; <sup>1</sup>H NMR (400 MHz, CDCl<sub>3</sub>):  $\delta$  1.25 (d,  $J$  = 6.8 Hz, 3H, CH(CH<sub>3</sub>)<sub>2</sub>), 1.30 (d,  $J$  = 6.8 Hz, 3H, CH(CH<sub>3</sub>)<sub>2</sub>), 1.66 (d,  $J$  = 6.8 Hz, 3H, CH(CH<sub>3</sub>)Ph), 4.12 (septet,  $J$  = 6.8 Hz, 1H, CH(CH<sub>3</sub>)<sub>2</sub>), 4.93 (q,  $J$  = 6.8 Hz, 1H, CH(CH<sub>3</sub>)Ph), 6.70 (d,  $J$  = 8.0 Hz, 2H, ArH), 7.22–7.25 (m, 1H, ArH), 7.31–7.37 (m, 6H, ArH); <sup>13</sup>C NMR (100 MHz, CDCl<sub>3</sub>):  $\delta$  18.0 (CH<sub>3</sub>), 19.9 (CH<sub>3</sub>), 20.9 (CH<sub>3</sub>), 48.8 (CH), 52.7 (CH), 115.0 (CH), 117.8 (q,  $J$  = 31 Hz, C), 125.1 (q,  $J$  = 268 Hz, CF<sub>3</sub>), 125.7 (q,  $J$  = 3.8 Hz, CH), 126.5 (CH), 126.6 (CH), 128.5 (CH), 143.1 (C), 149.6 (C); HRMS (FAB) calcd for C<sub>18</sub>H<sub>21</sub>F<sub>3</sub>N [M+H]<sup>+</sup> 308.1621, found 308.1632.

### ***N*-Cyclohexyl-*N*-(1-phenylethyl)-*p*-toluidine (1l)**

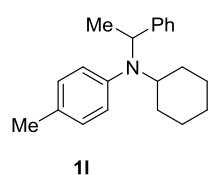

Colorless oil; IR (KBr)  $\nu$  2930, 1510, 1450, 1236, 1161, 1111, 699  $\text{cm}^{-1}$ ;  $^1\text{H}$  NMR (400 MHz,  $\text{CDCl}_3$ ):  $\delta$  0.99–1.06 (m, 1H,  $^{\text{c}}\text{Hex}$ ), 1.15–1.34 (m, 4H,  $^{\text{c}}\text{Hex}$ ), 1.45 (d,  $J = 6.8$  Hz, 3H,  $\text{CH}(\text{CH}_3)\text{Ph}$ ), 1.57 (d,  $J = 12.8$  Hz, 1H,  $^{\text{c}}\text{Hex}$ ), 1.71–1.77 (m, 2H,  $^{\text{c}}\text{Hex}$ ), 1.90–1.93 (m, 2H,  $^{\text{c}}\text{Hex}$ ), 2.23 (s, 3H,  $\text{ArCH}_3$ ), 3.30 (t,  $J = 11.2$  Hz, 1H,  $^{\text{c}}\text{Hex}$ ), 4.72 (q,  $J = 6.8$  Hz, 1H,  $\text{CH}(\text{CH}_3)\text{Ph}$ ), 6.72 (d,  $J = 8.0$  Hz, 2H,  $\text{ArH}$ ), 6.94 (d,  $J = 8.0$  Hz, 2H,  $\text{ArH}$ ), 7.20 (t,  $J = 8.0$  Hz, 1H,  $\text{ArH}$ ), 7.30 (t,  $J = 8.0$  Hz, 2H,  $\text{ArH}$ ), 7.41 (d,  $J = 8.0$  Hz, 2H,  $\text{ArH}$ );  $^{13}\text{C}$  NMR (100 MHz,  $\text{CDCl}_3$ ):  $\delta$  20.1 ( $\text{CH}_3$ ), 20.4 ( $\text{CH}_3$ ), 26.0 ( $\text{CH}_2$ ), 26.2 ( $\text{CH}_2$ ), 26.3 ( $\text{CH}_2$ ), 30.9 ( $\text{CH}_2$ ), 31.2 ( $\text{CH}_2$ ), 54.8 (CH), 58.2 (CH), 121.2 (CH), 126.2 (CH), 126.9 (CH), 128.2 (CH), 128.5 (C), 128.7 (CH), 144.6 (C), 145.5 (C); HRMS (FAB) calcd for  $\text{C}_{21}\text{H}_{27}\text{N}$   $[\text{M}]^+$  293.2143, found 293.2140.

### ***N*-Isopropyl-*N*-(1-phenylethyl)naphthalen-2-amine (1p)**

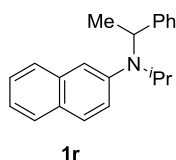

Colorless oil; IR (KBr)  $\nu$  3056, 2970, 1626, 1597, 1507, 1373, 1276, 1234, 1185, 827, 743, 700  $\text{cm}^{-1}$ ;  $^1\text{H}$  NMR (400 MHz,  $\text{CDCl}_3$ ):  $\delta$  1.20 (d,  $J = 6.8$  Hz, 3H,  $\text{CH}(\text{CH}_3)_2$ ), 1.26 (d,  $J = 6.8$  Hz, 3H,  $\text{CH}(\text{CH}_3)_2$ ), 1.57 (d,  $J = 6.8$  Hz, 3H,  $\text{CH}(\text{CH}_3)\text{Ph}$ ), 4.00 (septet,  $J = 6.8$  Hz, 1H,  $\text{CH}(\text{CH}_3)_2$ ), 4.87 (q,  $J = 6.8$  Hz, 1H,  $\text{CH}(\text{CH}_3)\text{Ph}$ ), 7.05 (dd,  $J = 8.8, 2.0$  Hz, 1H,  $\text{ArH}$ ), 7.15 (s, 1H,  $\text{ArH}$ ), 7.15–7.25 (m, 2H,  $\text{ArH}$ ), 7.32–7.36 (m, 3H,  $\text{ArH}$ ), 7.46 (d,  $J = 7.6$  Hz, 2H,  $\text{ArH}$ ), 7.55 (d,  $J = 8.8$  Hz, 1H,  $\text{ArH}$ ), 7.61 (d,  $J = 8.0$  Hz, 1H,  $\text{ArH}$ ), 7.66 (d,  $J = 8.0$  Hz, 1H,  $\text{ArH}$ );  $^{13}\text{C}$  NMR (100 MHz,  $\text{CDCl}_3$ ):  $\delta$  19.7 ( $\text{CH}_3$ ), 20.5 ( $\text{CH}_3$ ), 49.0 (CH), 54.2 (CH), 113.7 (CH), 113.8 (CH), 122.1 (CH), 122.6 (CH), 125.8 (CH), 126.4 (CH), 126.8 (CH), 127.3 (CH), 127.4 (CH), 127.8 (C), 128.3 (CH), 134.5 (C), 144.9 (C), 145.1 (C); HRMS (FAB) calcd for  $\text{C}_{21}\text{H}_{24}\text{N}$   $[\text{M}+\text{H}]^+$  290.1903, found 290.1909.

### ***N*-Isopropyl-*N*-(1-phenylethyl)quinolin-6-amine (1q)**

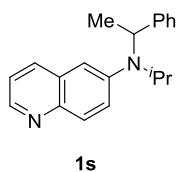

Colorless oil; IR (KBr)  $\nu$  2971, 1616, 1588, 1504, 1374, 1256  $\text{cm}^{-1}$ ;  $^1\text{H}$  NMR (400 MHz,  $\text{CDCl}_3$ ):  $\delta$  1.25 (d,  $J = 6.4$  Hz, 3H,  $\text{CH}(\text{CH}_3)_2$ ), 1.32 (d,  $J = 6.4$  Hz, 3H,  $\text{CH}(\text{CH}_3)_2$ ), 1.64 (d,  $J = 6.4$  Hz, 3H,  $\text{CH}(\text{CH}_3)\text{Ph}$ ), 4.10 (septet,  $J = 6.4$  Hz, 1H,  $\text{CH}(\text{CH}_3)_2$ ), 4.93 (q,  $J = 6.4$  Hz, 1H,  $\text{CH}(\text{CH}_3)\text{Ph}$ ), 6.98 (d,  $J = 2.4$  Hz, 1H,  $\text{ArH}$ ), 7.20–7.26 (m, 3H,  $\text{ArH}$ ), 7.34 (t,  $J = 7.2$  Hz, 2H,  $\text{ArH}$ ), 7.44 (d,  $J = 8.0$  Hz, 2H,  $\text{ArH}$ ), 7.79 (d,  $J = 9.6$  Hz, 1H,  $\text{ArH}$ ), 7.88 (d,  $J = 8.0$  Hz, 1H,  $\text{ArH}$ ), 8.61 (d,  $J = 3.2$  Hz, 1H,  $\text{ArH}$ );  $^{13}\text{C}$  NMR (100 MHz,  $\text{CDCl}_3$ ):  $\delta$  19.0 ( $\text{CH}_3$ ), 20.2 ( $\text{CH}_3$ ), 20.9 ( $\text{CH}_3$ ), 49.1 (CH), 53.5 (CH), 77.2 (CH), 110.6 (CH), 121.0 (CH), 124.1 (CH), 126.5 (CH), 126.7 (CH), 128.4 (CH), 128.8 (CH), 129.4 (CH), 129.4 (C), 134.1 (CH), 142.9 (C), 144.0 (C), 145.6 (C), 146.7 (CH);

HRMS (FAB) calcd for C<sub>20</sub>H<sub>23</sub>N [M+H]<sup>+</sup> 291.1856, found 291.1861.

### ***N*-Isopropyl-*N*-(1-phenylethyl)-3,4-dimethylaniline (1r)**

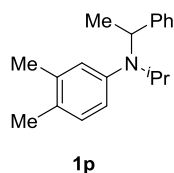

Colorless oil; IR (KBr)  $\nu$  2968, 1613, 1508, 1452, 1372, 1265, 1181, 1108, 765, 700 cm<sup>-1</sup>; <sup>1</sup>H NMR (400 MHz, CDCl<sub>3</sub>):  $\delta$  1.06 (d,  $J$  = 6.8 Hz, 3H, CH(CH<sub>3</sub>)<sub>2</sub>), 1.10 (d,  $J$  = 6.8 Hz, 3H, CH(CH<sub>3</sub>)<sub>2</sub>), 1.40 (d,  $J$  = 6.8 Hz, 3H, CH(CH<sub>3</sub>)Ph), 2.16 (s, 3H, ArCH<sub>3</sub>), 2.18 (s, 3H, ArCH<sub>3</sub>), 3.66 (septet,  $J$  = 6.8 Hz, 1H, CH(CH<sub>3</sub>)<sub>2</sub>), 4.66 (q,  $J$  = 6.8 Hz, 1H, CH(CH<sub>3</sub>)Ph), 6.63 (d,  $J$  = 8.0 Hz, 1H, ArH), 6.72 (s, 1H, ArH), 6.92 (d,  $J$  = 8.0 Hz, 1H, ArH), 7.20 (t,  $J$  = 8.0 Hz, 1H, ArH), 7.30 (t,  $J$  = 8.0 Hz, 2H, ArH), 7.42 (d,  $J$  = 8.0 Hz, 2H, ArH); <sup>13</sup>C NMR (100 MHz, CDCl<sub>3</sub>):  $\delta$  18.8 (CH<sub>3</sub>), 19.5 (CH<sub>3</sub>), 20.2 (CH<sub>3</sub>), 20.4 (CH<sub>3</sub>), 21.0 (CH<sub>3</sub>), 48.7 (CH), 55.3 (CH), 119.6 (CH), 123.3 (CH), 126.3 (CH), 127.0 (CH), 127.8 (C), 128.2 (CH), 129.2 (CH), 136.1 (C), 144.6 (C), 145.6 (C); HRMS (FAB) calcd for C<sub>19</sub>H<sub>26</sub>N [M+H]<sup>+</sup> 268.2060, found 268.2068.

### ***N*-Isopropyl-*N*-(1-phenylethyl)-3-methoxycarbonyl-4-methylaniline (1s)**

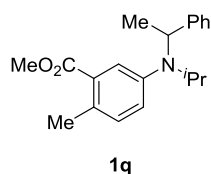

Colorless oil; IR (KBr)  $\nu$  2970, 1722, 1610, 1508, 1435, 1254, 1075, 700 cm<sup>-1</sup>; <sup>1</sup>H NMR (400 MHz, CDCl<sub>3</sub>):  $\delta$  1.10 (d,  $J$  = 6.8 Hz, 3H, CH(CH<sub>3</sub>)<sub>2</sub>), 1.13 (d,  $J$  = 6.8 Hz, 3H, CH(CH<sub>3</sub>)<sub>2</sub>), 1.43 (d,  $J$  = 6.8 Hz, 3H, CH(CH<sub>3</sub>)Ph), 2.47 (s, 3H, ArCH<sub>3</sub>), 3.73 (septet,  $J$  = 6.8 Hz, 1H, CH(CH<sub>3</sub>)<sub>2</sub>), 3.85 (s, 3H, CO<sub>2</sub>CH<sub>3</sub>), 4.71 (q,  $J$  = 6.8 Hz, 1H, CH(CH<sub>3</sub>)Ph), 6.86 (dd,  $J$  = 8.8, 2.8 Hz, 1H, ArH), 6.99 (d,  $J$  = 8.8 Hz, 1H, ArH), 7.22 (t,  $J$  = 8.0 Hz, 1H, ArH), 7.31 (t,  $J$  = 8.0 Hz, 2H, ArH), 7.40 (d,  $J$  = 8.0 Hz, 2H, ArH), 7.48 (d,  $J$  = 2.8 Hz, 1H, ArH); <sup>13</sup>C NMR (100 MHz, CDCl<sub>3</sub>):  $\delta$  19.7 (CH<sub>3</sub>), 20.0 (CH<sub>3</sub>), 20.8 (CH<sub>3</sub>), 48.8 (CH), 51.7 (CH<sub>3</sub>), 55.0 (CH), 122.8 (CH), 125.5 (CH), 126.4 (CH), 126.9 (CH), 128.3 (CH), 129.3 (C), 130.8 (C), 131.4 (CH), 144.5 (C), 144.8 (C), 168.5 (C=O); HRMS (FAB) calcd for C<sub>20</sub>H<sub>26</sub>NO<sub>2</sub> [M+H]<sup>+</sup> 312.1958, found 312.1968.

### ***N*-Isopropyl-*N*-(1-phenylethyl)-3,5-dibromo-4-methylaniline (1t)**

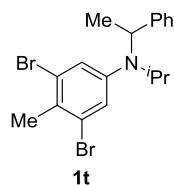

Colorless solid; mp 85–86 °C; IR (KBr)  $\nu$  2971, 1594, 1482, 1261, 1180, 1037, 733 cm<sup>-1</sup>; <sup>1</sup>H NMR (400 MHz, CDCl<sub>3</sub>):  $\delta$  1.13 (d,  $J$  = 6.8 Hz, 3H, CH(CH<sub>3</sub>)<sub>2</sub>), 1.19 (d,  $J$  = 6.8 Hz, 3H, CH(CH<sub>3</sub>)<sub>2</sub>), 1.52 (d,  $J$  = 6.8 Hz, 3H, CH(CH<sub>3</sub>)Ph), 2.43 (s, 3H, ArCH<sub>3</sub>), 3.77 (septet,  $J$  = 6.8 Hz, 1H, CH(CH<sub>3</sub>)<sub>2</sub>), 4.73 (q,  $J$  = 6.8 Hz, 1H, CH(CH<sub>3</sub>)Ph), 6.95 (s, 2H, ArH), 7.22–7.25 (m, 1H, ArH), 7.30–7.35 (m, 4H, ArH); <sup>13</sup>C NMR (100 MHz, CDCl<sub>3</sub>):  $\delta$  18.8 (CH<sub>3</sub>), 20.4 (CH<sub>3</sub>), 22.5 (CH<sub>3</sub>), 48.9 (CH), 54.2 (CH), 121.8 (CH), 121.9 (CH), 124.7 (C), 126.1 (C), 126.7 (CH), 128.4 (CH), 143.4 (C), 146.5 (C); HRMS (FAB) calcd for C<sub>18</sub>H<sub>21</sub>Br<sub>2</sub>N [M]<sup>+</sup> 409.0041, found 409.0037.



## 5. Procedure for the preparation of (*R*)-*N*-isopropyl-*N*-(1-hydroxypropan-2-yl)-*p*-toluidines

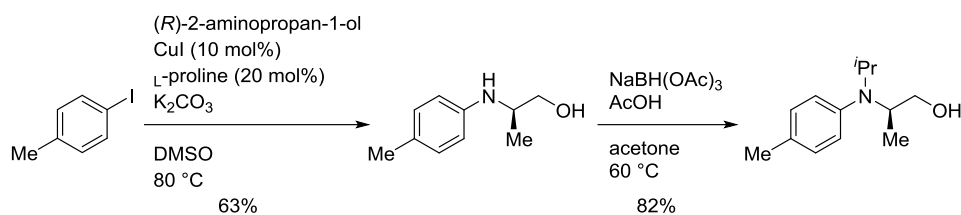

A mixture of 4-iodotoluene (2.18 g, 10 mmol), (*R*)-2-aminopropan-1-ol (1.16 mL, 15 mmol), CuI (191 mg, 1.0 mmol, 10 mol%), L-proline (230 mg, 2.0 mmol, 20 mol%), and K<sub>2</sub>CO<sub>3</sub> (2.76 g, 20 mmol) in DMSO (6.0 mL) was heated to 80 °C under Ar atmosphere. After stirring for 12 h at the same temperature, the reaction was quenched with saturated aqueous NH<sub>4</sub>Cl, and the mixture was extracted with AcOEt. The combined organic extracts were successively washed with brine, and dried over anhydrous Na<sub>2</sub>SO<sub>4</sub>. Filtration and evaporation in vacuo furnished the crude product, which was purified by column chromatography (silica gel, 3:2 *n*-hexane/AcOEt) to give (*R*)-*N*-(1-hydroxypropan-2-yl)-*p*-toluidine<sup>6</sup> (1.04 g, 63%) as a colorless oil:  $[\alpha]_{\text{D}}^{23} = -36.0$  (*c* 1.33, CHCl<sub>3</sub>); <sup>1</sup>H NMR (300 MHz, CDCl<sub>3</sub>): δ 1.17 (d, *J* = 6.3 Hz, 3H, CH(CH<sub>3</sub>)CH<sub>2</sub>), 2.24 (s, 3H, ArCH<sub>3</sub>), 3.48 (dd, *J* = 10.5, 6.3 Hz, 1H, CHCHHO), 3.59 (ddq, *J* = 6.3, 6.3, 4.8 Hz, 1H, CH(CH<sub>3</sub>)CH<sub>2</sub>), 3.71 (dd, *J* = 10.5, 4.2 Hz, 1H, CHCHHO), 6.60 (d, *J* = 8.4 Hz, 2H, ArH), 6.99 (d, *J* = 8.4 Hz, 2H, ArH).

To a solution of (*R*)-*N*-(1-hydroxypropan-2-yl)-*p*-toluidine (330 mg, 2.0 mmol) and AcOH (0.34 mL, 6.0 mmol) in acetone (10 mL) was added NaBH(OAc)<sub>3</sub> (1.27 g, 6.0 mmol) at room temperature under Ar atmosphere and the mixture was heated to 60 °C. After stirring for 12 h at the same temperature, the reaction was quenched with saturated aqueous NaHCO<sub>3</sub>, and the mixture was extracted with AcOEt. The combined organic extracts were successively washed with brine, and dried over anhydrous Na<sub>2</sub>SO<sub>4</sub>. Filtration and evaporation in vacuo furnished the crude product, which was purified by column chromatography (silica gel, 3:1 *n*-hexane/AcOEt) to give (*R*)-*N*-isopropyl-*N*-(1-hydroxypropan-2-yl)-*p*-toluidine (340 mg, 82%) as a colorless oil:  $[\alpha]_{\text{D}}^{24} = -167.3$  (*c* 1.01, CHCl<sub>3</sub>); IR (KBr)  $\nu$  3366, 2969, 1616, 1514, 1184, 1042 cm<sup>-1</sup>; <sup>1</sup>H NMR (400 MHz, CDCl<sub>3</sub>): δ 1.00 (d, *J* = 6.8 Hz, 3H, CH(CH<sub>3</sub>)CH<sub>2</sub>), 1.12 (d, *J* = 6.4 Hz, 3H, CH(CH<sub>3</sub>)<sub>2</sub>), 1.15 (d, *J* = 6.4 Hz, 3H, CH(CH<sub>3</sub>)<sub>2</sub>), 2.30 (s, 3H, ArCH<sub>3</sub>), 3.28 (dd, *J* = 10.4, 9.2 Hz, 1H, CHHO), 3.44 (dd, *J* = 10.4, 5.2 Hz, 1H, CHHO), 3.51–3.55 (m, 1H, CH(CH<sub>3</sub>)CH<sub>2</sub>), 3.59 (septet, *J* = 6.4 Hz, 1H, CH(CH<sub>3</sub>)<sub>2</sub>), 6.94 (d, *J* = 8.0 Hz, 2H, ArH), 7.06 (d, *J* = 8.0 Hz, 2H, ArH); <sup>13</sup>C NMR (100 MHz, CDCl<sub>3</sub>): δ 14.6 (CH<sub>3</sub>), 20.7 (CH<sub>3</sub>), 21.3 (CH<sub>3</sub>), 23.3 (CH<sub>3</sub>), 49.4 (CH), 54.7 (CH), 64.2 (CH<sub>2</sub>), 125.5 (CH), 129.1 (CH), 132.5 (C), 144.0 (C); HRMS (FAB) calcd for C<sub>13</sub>H<sub>22</sub>NO [M+H]<sup>+</sup> 208.1696, found 208.1708.

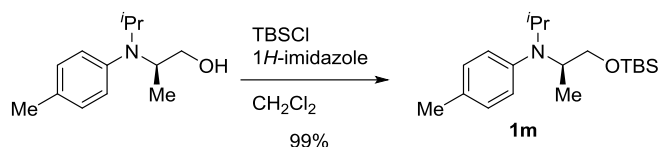

To a solution of (*R*)-*N*-isopropyl-*N*-(1-hydroxypropan-2-yl)-*p*-toluidine (311 mg, 1.5 mmol) and 1*H*-imidazole (153 mg, 2.3 mmol) in CH<sub>2</sub>Cl<sub>2</sub> (5.0 mL) was added TBSCl (339 mg, 2.3 mmol) at 0 °C under Ar atmosphere. After stirring at room temperature for 1 h, the reaction was quenched with water, and the mixture was extracted with CH<sub>2</sub>Cl<sub>2</sub>. The combined organic extracts were dried over anhydrous Na<sub>2</sub>SO<sub>4</sub>. Filtration and evaporation in vacuo furnished the crude product, which was purified by column chromatography (silica gel, 10:1 *n*-hexane/AcOEt) to give **1m** (478 mg, 99%) as a colorless oil:  $[\alpha]_{\text{D}}^{24} = -27.1$  (*c* 1.01, CHCl<sub>3</sub>); IR (KBr)  $\nu$  2928, 1515, 1253, 1088, 836 cm<sup>-1</sup>; <sup>1</sup>H NMR (400 MHz, CDCl<sub>3</sub>):  $\delta$  0.00 (s, 6H, Si(CH<sub>3</sub>)<sub>2</sub>), 0.87 (s, 9H, Si<sup>*t*</sup>Bu) 1.11–1.17 (m, 9H, CH(CH<sub>3</sub>)<sub>2</sub> and CH(CH<sub>3</sub>)CH<sub>2</sub>), 2.23 (s, 3H, ArCH<sub>3</sub>), 3.54–3.57 (m, 2H, CH<sub>2</sub>OSi), 3.68–3.76 (m, 2H, CH(CH<sub>3</sub>)<sub>2</sub> and CH(CH<sub>3</sub>)CH<sub>2</sub>), 6.78 (d, *J* = 8.0 Hz, 2H, Ar*H*), 6.97 (d, *J* = 8.0 Hz, 2H, Ar*H*); <sup>13</sup>C NMR (100 MHz, CDCl<sub>3</sub>):  $\delta$  -5.4 (CH<sub>3</sub>), 16.3 (CH<sub>3</sub>), 18.2 (C), 20.4 (CH<sub>3</sub>), 21.0 (CH<sub>3</sub>), 21.9 (CH<sub>3</sub>), 25.9 (CH<sub>3</sub>), 48.9 (CH), 54.0 (CH), 66.7 (CH<sub>2</sub>), 120.4 (CH), 128.1 (C), 128.9 (CH), 145.5 (C); HRMS (FAB) calcd for C<sub>19</sub>H<sub>36</sub>NOSi [M+H]<sup>+</sup> 322.2561, found 322.2565.

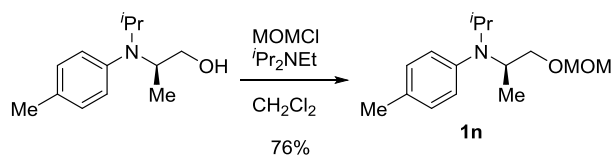

To a solution of (*R*)-*N*-isopropyl-*N*-(1-hydroxypropan-2-yl)-*p*-toluidine (160 mg, 0.77 mmol) and *i*Pr<sub>2</sub>NEt (0.20 mL, 1.2 mmol) in CH<sub>2</sub>Cl<sub>2</sub> (10 mL) was added MOMCl (71 μL, 0.93 mmol) at room temperature under Ar atmosphere. After stirring for 12 h, the reaction was quenched with water, and the mixture was extracted with CH<sub>2</sub>Cl<sub>2</sub>. The combined organic extracts were dried over anhydrous Na<sub>2</sub>SO<sub>4</sub>. Filtration and evaporation in vacuo furnished the crude product, which was purified by column chromatography (silica gel, 10:1 *n*-hexane/AcOEt) to give **1n** (147 mg, 76%) as a colorless oil:  $[\alpha]_{\text{D}}^{24} = -48.2$  (*c* 1.06, CHCl<sub>3</sub>); IR (KBr)  $\nu$  2969, 1616, 1515, 1109, 1045, 920, 808 cm<sup>-1</sup>; <sup>1</sup>H NMR (400 MHz, CDCl<sub>3</sub>):  $\delta$  1.17 (d, *J* = 6.4 Hz, 6H, CH(CH<sub>3</sub>)<sub>2</sub>), 1.20 (d, *J* = 6.4 Hz, 3H, CH(CH<sub>3</sub>)CH<sub>2</sub>), 2.26 (s, 3H, ArCH<sub>3</sub>), 3.34 (s, 3H, OCH<sub>3</sub>), 3.49 (t, *J* = 8.0 Hz, 1H, CH(CH<sub>3</sub>)CHH), 3.62–3.76 (m, 3H, CH(CH<sub>3</sub>)<sub>2</sub>, CH(CH<sub>3</sub>)CHH), 4.60 (s, 2H, OCH<sub>2</sub>OCH<sub>3</sub>), 6.82 (d, *J* = 8.0 Hz, 2H, Ar*H*), 7.01 (d, *J* = 8.0 Hz, 2H, Ar*H*); <sup>13</sup>C NMR (100 MHz, CDCl<sub>3</sub>):  $\delta$  16.6 (CH<sub>3</sub>), 20.4 (CH<sub>3</sub>), 21.0 (CH<sub>3</sub>), 21.9 (CH<sub>3</sub>), 48.9 (CH), 52.0 (CH), 55.2 (CH<sub>3</sub>), 71.8 (CH<sub>2</sub>), 96.6 (CH<sub>2</sub>), 121.2 (CH), 129.0 (CH), 129.0 (C), 145.2 (C); HRMS (FAB) calcd for C<sub>15</sub>H<sub>26</sub>NO<sub>2</sub> [M+H]<sup>+</sup> 252.1958, found

252.1960.

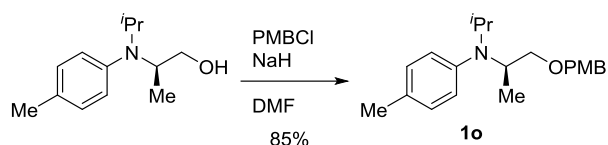

To a solution of *(R)*-*N*-isopropyl-*N*-(1-hydroxypropan-2-yl)-*p*-toluidine (175 mg, 0.84 mmol) in DMF (1.7 mL) was added NaH (60%, 50.4 mg, 1.3 mmol) at 0 °C under Ar atmosphere. After stirring at room temperature for 30 min, PMBCl (0.17 mL, 1.3 mmol) was added at 0 °C. After stirring at room temperature for 4 h, the reaction was quenched with water, and the mixture was extracted with CH<sub>2</sub>Cl<sub>2</sub>. The combined organic extracts were dried over anhydrous Na<sub>2</sub>SO<sub>4</sub>. Filtration and evaporation in vacuo furnished the crude product, which was purified by column chromatography (silica gel, 10:1 *n*-hexane/AcOEt) to give **1o** (234 mg, 85%) as a colorless oil:  $[\alpha]_{\text{D}}^{24} = -38.7$  (*c* 1.05, CHCl<sub>3</sub>); IR (KBr)  $\nu$  2969, 1613, 1513, 1247, 1095, 1036, 808 cm<sup>-1</sup>; <sup>1</sup>H NMR (400 MHz, CDCl<sub>3</sub>):  $\delta$  1.15 (d, *J* = 6.8 Hz, 6H, CH(CH<sub>3</sub>)<sub>2</sub>), 1.20 (d, *J* = 6.8 Hz, 3H, CH(CH<sub>3</sub>)CH<sub>2</sub>), 2.26 (s, 3H, ArCH<sub>3</sub>), 3.42 (t, *J* = 8.4 Hz, 1H, CH(CH<sub>3</sub>)CHH), 3.55 (dd, *J* = 8.4, 4.8 Hz, 1H, CH(CH<sub>3</sub>)CHH), 3.69–3.76 (m, 2H, CH(CH<sub>3</sub>)<sub>2</sub> and CH(CH<sub>3</sub>)CH<sub>2</sub>), 3.80 (s, 3H, ArOCH<sub>3</sub>), 4.41 (s, 2H, OCH<sub>2</sub>OAr), 6.80 (d, *J* = 8.0 Hz, 2H, ArH), 6.86 (d, *J* = 8.0 Hz, 2H, ArH), 6.99 (d, *J* = 8.0 Hz, 2H, ArH), 7.23 (d, *J* = 8.0 Hz, 2H, ArH); <sup>13</sup>C NMR (100 MHz, CDCl<sub>3</sub>):  $\delta$  16.8 (CH<sub>3</sub>), 20.4 (CH<sub>3</sub>), 21.0 (CH<sub>3</sub>), 21.8 (CH<sub>3</sub>), 48.8 (CH), 51.9 (CH), 55.2 (CH<sub>3</sub>), 72.7 (CH<sub>2</sub>), 74.1 (CH<sub>2</sub>), 113.7 (CH), 120.9 (CH), 128.6 (C), 129.0 (CH), 129.1 (CH), 130.6 (C), 145.3 (C), 159.0 (C); HRMS (FAB) calcd for C<sub>21</sub>H<sub>30</sub>NO<sub>2</sub> [M+H]<sup>+</sup> 328.2271, found 328.2274.

## 6. Typical procedure for Rh(II)-catalyzed *ortho* C–H amination of *N,N*-dialkylanilines:

### Preparation of *N,N*-diisopropyl-4-bromo-2-(tosylamido)aniline (**2d**)

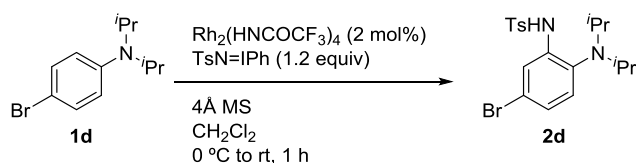

TsN=IPh (44.7 mg, 0.12 mmol) was added to a stirred mixture of *N,N*-diisopropyl-4-bromoaniline (**1d**) (25.6 mg, 0.10 mmol), Rh<sub>2</sub>(HNCOCF<sub>3</sub>)<sub>4</sub> (1.3 mg, 0.002 mmol, 2 mol %) and 4Å MS (powder, 40 mg) in CH<sub>2</sub>Cl<sub>2</sub> (1.0 mL) at 0 °C under Ar atmosphere. After stirring at room temperature for 1 h, the whole mixture was filtered through a pad of Celite, and the filtrate was evaporated in vacuo to furnish the crude product, which was purified by column chromatography (silica gel, 8:1 *n*-hexane/AcOEt) to give 1,2-diaminobenzene **2d** (35.3 mg, 83%) as a colorless solid: mp 151–153 °C; IR (KBr)  $\nu$  3194, 2971, 1485, 1382, 1165, 913,

745  $\text{cm}^{-1}$ ;  $^1\text{H}$  NMR (400 MHz,  $\text{CDCl}_3$ , 60  $^\circ\text{C}$ ):  $\delta$  0.85 (d,  $J = 6.4$  Hz, 12H,  $\text{CH}(\text{CH}_3)_2$ ), 2.36 (s, 3H,  $\text{ArCH}_3$ ), 3.35 (septet,  $J = 6.4$  Hz, 2H,  $\text{CH}(\text{CH}_3)_2$ ), 6.94 (d,  $J = 8.4$  Hz, 1H,  $\text{ArH}$ ), 7.05 (dd,  $J = 8.4, 2.4$  Hz, 1H,  $\text{ArH}$ ), 7.24 (d,  $J = 8.4$  Hz, 2H,  $\text{ArH}$ ), 7.76 (d,  $J = 2.4$  Hz, 1H,  $\text{ArH}$ ), 7.78 (d,  $J = 8.4$  Hz, 2H,  $\text{ArH}$ ), 8.54 (brs, 1H,  $\text{NH}$ );  $^{13}\text{C}$  NMR (100 MHz,  $\text{CDCl}_3$ , 50  $^\circ\text{C}$ ):  $\delta$  20.4 ( $\text{CH}_3$ ), 21.4 ( $\text{CH}_3$ ), 50.1 (CH), 118.6 (CH), 120.0 (C), 125.4 (CH), 127.2 (CH), 129.6 (CH), 129.8 (CH), 134.0 (C), 137.1 (C), 139.4 (C), 144.0 (C); HRMS (FAB) calcd for  $\text{C}_{19}\text{H}_{26}\text{BrN}_2\text{O}_2\text{S}$   $[\text{M}+\text{H}]^+$  425.0893, found 425.0891.

### ***N,N*-Diisopropyl-4-butyl-2-(tosylamido)aniline (2e)**

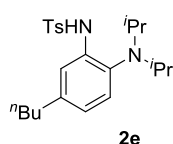

Yield 87%; purified by column chromatography (silica gel, 10:1 *n*-hexane/ $\text{AcOEt}$ ); colorless solid; mp 97–98  $^\circ\text{C}$ ; IR (KBr)  $\nu$  3208, 2967, 1501, 1381, 905  $\text{cm}^{-1}$ ;  $^1\text{H}$  NMR (400 MHz,  $\text{CDCl}_3$ , 60  $^\circ\text{C}$ ):  $\delta$  0.84 (d,  $J = 6.4$  Hz, 12H,  $\text{CH}(\text{CH}_3)_2$ ), 0.92 (t,  $J = 7.6$  Hz, 3H,  $(\text{CH}_2)_3\text{CH}_3$ ), 1.32 (sextet,  $J = 7.6$  Hz, 2H,  $\text{CH}_2\text{CH}_2\text{CH}_3$ ), 1.58 (quintet,  $J = 7.6$  Hz, 2H,  $\text{CH}_2\text{CH}_2\text{CH}_2$ ), 2.34 (s, 3H,  $\text{ArCH}_3$ ), 2.55 (t,  $J = 7.6$  Hz, 2H,  $\text{ArCH}_2\text{CH}_2$ ), 3.34 (septet,  $J = 6.4$  Hz, 2H,  $\text{CH}(\text{CH}_3)_2$ ), 6.72 (d,  $J = 8.0$  Hz, 1H,  $\text{ArH}$ ), 6.96 (d,  $J = 8.0$  Hz, 1H,  $\text{ArH}$ ), 7.18 (d,  $J = 8.0$  Hz, 2H,  $\text{ArH}$ ), 7.42 (s, 1H,  $\text{ArH}$ ), 7.78 (d,  $J = 8.0$  Hz, 2H,  $\text{ArH}$ ), 8.54 (brs, 1H,  $\text{NH}$ );  $^{13}\text{C}$  NMR (100 MHz,  $\text{CDCl}_3$ , 60  $^\circ\text{C}$ ):  $\delta$  13.9 ( $\text{CH}_3$ ), 20.6 ( $\text{CH}_3$ ), 21.3 ( $\text{CH}_3$ ), 22.3 ( $\text{CH}_2$ ), 33.3 ( $\text{CH}_2$ ), 35.5 ( $\text{CH}_2$ ), 50.1 (CH), 115.6 (CH), 122.4 (C), 127.3 (CH), 128.1 (CH), 129.3 (CH), 132.5 (CH), 137.6 (C), 137.7 (C), 141.3 (C), 143.5 (C); HRMS (FAB) calcd for  $\text{C}_{23}\text{H}_{35}\text{N}_2\text{O}_2\text{S}$   $[\text{M}+\text{H}]^+$  403.2414, found 403.2422.

### ***N,N*-Diisopropyl-4-phenyl-2-(tosylamido)aniline (2f)**

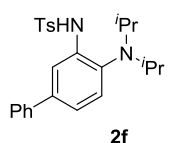

Yield 87%; purified by column chromatography (silica gel, 8:1 *n*-hexane/ $\text{AcOEt}$ ); colorless amorphous; IR (KBr)  $\nu$  3200, 2971, 1484, 1380, 1162, 942, 752  $\text{cm}^{-1}$ ;  $^1\text{H}$  NMR (400 MHz,  $\text{CDCl}_3$ , 60  $^\circ\text{C}$ ):  $\delta$  0.90 (d,  $J = 6.8$  Hz, 12H,  $\text{CH}(\text{CH}_3)_2$ ), 2.33 (s, 3H,  $\text{ArCH}_3$ ), 3.40 (septet,  $J = 6.8$  Hz, 2H,  $\text{CH}(\text{CH}_3)_2$ ), 7.13 (d,  $J = 8.0$  Hz, 1H,  $\text{ArH}$ ), 7.16 (dd,  $J = 8.0, 2.0$  Hz, 1H,  $\text{ArH}$ ), 7.20 (d,  $J = 8.0$  Hz, 2H,  $\text{ArH}$ ), 7.31 (t,  $J = 8.0$  Hz, 1H,  $\text{ArH}$ ), 7.41 (t,  $J = 8.0$  Hz, 2H,  $\text{ArH}$ ), 7.56 (dd,  $J = 8.0, 2.0$  Hz, 2H,  $\text{ArH}$ ), 7.82 (d,  $J = 8.0$  Hz, 2H,  $\text{ArH}$ ), 7.85 (d,  $J = 2.0$  Hz, 1H,  $\text{ArH}$ ), 8.61 (brs, 1H,  $\text{NH}$ );  $^{13}\text{C}$  NMR (100 MHz,  $\text{CDCl}_3$ , 60  $^\circ\text{C}$ ):  $\delta$  20.6 ( $\text{CH}_3$ ), 21.3 ( $\text{CH}_3$ ), 50.2 (CH), 114.1 (CH), 120.9 (CH), 127.0 (CH), 127.3 (CH), 127.4 (CH), 128.6 (CH), 128.7 (CH), 129.5 (CH), 134.3 (C), 137.6 (C), 138.3 (C), 139.4 (C), 140.6 (C), 143.6 (C); HRMS (FAB) calcd for  $\text{C}_{25}\text{H}_{31}\text{N}_2\text{O}_2\text{S}$   $[\text{M}+\text{H}]^+$  423.2101, found 423.2098.

### ***N,N*-Diisopropyl-4-methoxy-2-(tosylamido)aniline (2g)**

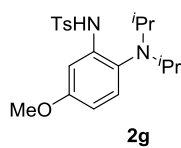

Yield 92%; purified by column chromatography (silica gel, 4:1 *n*-hexane/AcOEt); colorless solid; mp 130–132 °C; IR (KBr)  $\nu$  2971, 1505, 1381, 1159, 1091  $\text{cm}^{-1}$ ;  $^1\text{H}$  NMR (400 MHz,  $\text{CD}_3\text{CN}$ , 70 °C):  $\delta$  0.86 (d,  $J = 6.4$  Hz, 12H,  $\text{CH}(\text{CH}_3)_2$ ), 2.36 (s, 3H,  $\text{ArCH}_3$ ), 3.38 (septet,  $J = 6.4$  Hz, 2H,  $\text{CH}(\text{CH}_3)_2$ ), 3.76 (s, 3H,  $\text{OCH}_3$ ), 6.53 (dd,  $J = 8.8, 2.8$  Hz, 1H,  $\text{ArH}$ ), 7.09 (m, 2H,  $\text{ArH}$ ), 7.32 (d,  $J = 8.0$  Hz, 2H,  $\text{ArH}$ ), 7.80 (d,  $J = 8.0$  Hz, 2H,  $\text{ArH}$ ), 8.60 (brs, 1H,  $\text{NH}$ );  $^{13}\text{C}$  NMR (100 MHz,  $\text{CD}_3\text{CN}$ , 70 °C):  $\delta$  20.8 ( $\text{CH}_3$ ), 21.2 ( $\text{CH}_3$ ), 50.9 (CH), 55.9 ( $\text{CH}_3$ ), 102.1 (CH), 108.5 (CH), 128.0 (CH), 128.7 (C), 130.4 (CH), 130.5 (CH), 138.1 (C), 139.6 (C), 145.2 (C), 158.8 (C); HRMS (FAB) calcd for  $\text{C}_{20}\text{H}_{29}\text{N}_2\text{O}_3\text{S}$   $[\text{M}+\text{H}]^+$  377.1893, found 377.1908.

### ***N,N*-Diisopropyl-4-methoxycarbonyl-2-(tosylamido)aniline (2h)**

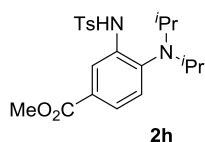

Yield 78%; purified by column chromatography (silica gel, 6:1 to 4:1 *n*-hexane/AcOEt); colorless solid; mp 157–159 °C; IR (KBr)  $\nu$  3209, 2974, 1720, 1383, 1245, 1164, 913, 746  $\text{cm}^{-1}$ ;  $^1\text{H}$  NMR (400 MHz,  $\text{CDCl}_3$ ):  $\delta$  0.85 (d,  $J = 6.4$  Hz, 12H,  $\text{CH}(\text{CH}_3)_2$ ), 2.36 (s, 3H,  $\text{ArCH}_3$ ), 3.40 (septet,  $J = 6.4$  Hz, 2H,  $\text{CH}(\text{CH}_3)_2$ ), 3.92 (s, 3H,  $\text{CO}_2\text{Me}$ ), 7.17 (d,  $J = 8.4$  Hz, 1H,  $\text{ArH}$ ), 7.23 (d,  $J = 8.0$  Hz, 2H,  $\text{ArH}$ ), 7.63 (d,  $J = 8.4$  Hz, 1H,  $\text{ArH}$ ), 7.81 (d,  $J = 8.0$  Hz, 2H,  $\text{ArH}$ ), 8.26 (s, 1H,  $\text{ArH}$ ), 8.66 (brs, 1H,  $\text{NH}$ );  $^{13}\text{C}$  NMR (100 MHz,  $\text{CDCl}_3$ ):  $\delta$  20.2 ( $\text{CH}_3$ ), 21.5 ( $\text{CH}_3$ ), 50.0 (CH), 52.2 ( $\text{CH}_3$ ), 116.2 (CH), 123.6 (CH), 127.2 (CH), 128.2 (CH), 128.2 (C), 129.6 (CH), 136.6 (C), 138.0 (C), 139.7 (C), 143.9 (C), 166.5 (C=O); HRMS (FAB) calcd for  $\text{C}_{21}\text{H}_{29}\text{N}_2\text{O}_4\text{S}$   $[\text{M}+\text{H}]^+$  405.1843, found 405.1856.

### ***N,N*-Diisopropyl-4-allyloxycarbonyl-2-(tosylamido)aniline (2i)**

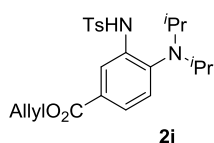

Yield 72%; purified by column chromatography (silica gel, 8:1 to 6:1 *n*-hexane/AcOEt); colorless oil; IR (KBr)  $\nu$  3207, 2973, 1720, 1382, 1239, 1165, 944, 749  $\text{cm}^{-1}$ ;  $^1\text{H}$  NMR (400 MHz,  $\text{CDCl}_3$ , 60 °C):  $\delta$  0.89 (d,  $J = 6.4$  Hz, 12H,  $\text{CH}(\text{CH}_3)_2$ ), 2.35 (s, 3H,  $\text{ArCH}_3$ ), 3.41 (septet,  $J = 6.4$  Hz, 2H,  $\text{CH}(\text{CH}_3)_2$ ), 4.81 (d,  $J = 5.6$  Hz, 2H,  $\text{CH}_2\text{CH}=\text{CHH}$ ), 5.29 (d,  $J = 10.4$  Hz, 1H,  $\text{CH}_2\text{CH}=\text{CHH}$ ), 5.41 (d,  $J = 17.2$  Hz, 1H,  $\text{CH}_2\text{CH}=\text{CHH}$ ), 6.03 (ddd,  $J = 17.2, 10.4, 5.6$  Hz, 1H,  $\text{CH}_2\text{CH}=\text{CHH}$ ), 7.16 (d,  $J = 8.0$  Hz, 1H,  $\text{ArH}$ ), 7.22 (d,  $J = 8.0$  Hz, 2H,  $\text{ArH}$ ), 7.64 (dd,  $J = 8.0, 2.0$  Hz, 1H,  $\text{ArH}$ ), 7.82 (d,  $J = 8.0$  Hz, 2H,  $\text{ArH}$ ), 8.23 (d,  $J = 2.0$  Hz, 1H,  $\text{ArH}$ ), 8.57 (brs, 1H,  $\text{NH}$ );  $^{13}\text{C}$  NMR (100 MHz,  $\text{CDCl}_3$ , 60 °C):  $\delta$  20.5 ( $\text{CH}_3$ ), 21.4 ( $\text{CH}_3$ ), 50.3 (CH), 65.5 ( $\text{CH}_2$ ), 116.6 (CH), 118.0 ( $\text{CH}_2$ ), 123.5 (CH), 127.4 (CH), 128.4 (CH), 128.5 (C), 129.6 (CH), 132.3 (CH), 137.2 (C), 138.3 (C), 139.9 (C), 143.9 (C), 165.6 (C=O); HRMS (FAB)

calcd for C<sub>23</sub>H<sub>31</sub>N<sub>2</sub>O<sub>4</sub>S [M+H]<sup>+</sup> 431.1999, found 431.2014.

### ***N*-Isopropyl-*N*-(1-phenylethyl)-2-(tosylamido)-*p*-toluidine (2j)**

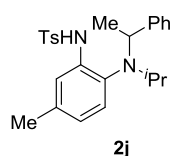

Yield 78%; purified by column chromatography (silica gel, 8:1 *n*-hexane/AcOEt); colorless oil; IR (KBr)  $\nu$  3222, 2971, 1504, 1379, 1235, 1168, 1090, 910, 704 cm<sup>-1</sup>; <sup>1</sup>H NMR (400 MHz, CDCl<sub>3</sub>, 60 °C):  $\delta$  0.70 (d,  $J$  = 6.4 Hz, 3H, CH(CH<sub>3</sub>)<sub>2</sub>), 0.80 (brs, 3H, CH(CH<sub>3</sub>)Ph), 0.90 (d,  $J$  = 6.4 Hz, 3H, CH(CH<sub>3</sub>)<sub>2</sub>), 2.30 (s, 3H, ArCH<sub>3</sub>), 2.33 (s, 3H, ArCH<sub>3</sub>), 3.13 (septet,  $J$  = 6.4 Hz, 1H, CH(CH<sub>3</sub>)<sub>2</sub>), 4.21 (q,  $J$  = 6.4 Hz, 1H, CH(CH<sub>3</sub>)Ph), 6.76 (d,  $J$  = 8.0 Hz, 1H, ArH), 7.00 (d,  $J$  = 8.0 Hz, 1H, ArH), 7.20 (d,  $J$  = 8.0 Hz, 2H, ArH), 7.24–7.40 (m, 6H, ArH), 7.80 (d,  $J$  = 8.0 Hz, 2H, ArH), 8.64 (brs, 1H, NH); <sup>13</sup>C NMR (100 MHz, CDCl<sub>3</sub>, 60 °C):  $\delta$  20.8 (CH<sub>3</sub>), 21.3 (CH<sub>3</sub>), 21.4 (CH<sub>3</sub>), 21.8 (CH<sub>3</sub>), 50.4 (CH), 60.4 (CH), 116.5 (CH), 123.1 (CH), 127.2 (CH), 127.3 (CH), 128.5 (CH), 128.7 (CH), 129.5 (CH), 129.5 (CH), 131.1 (C), 136.6 (C), 137.8 (C), 138.0 (C), 143.6 (C), 144.7 (C); HRMS (FAB) calcd for C<sub>25</sub>H<sub>31</sub>N<sub>2</sub>O<sub>2</sub>S [M+H]<sup>+</sup> 423.2101, found 423.2113.

### ***N*-Isopropyl-*N*-(1-phenylethyl)-2-(tosylamido)-4-trifluoromethylaniline (2k)**

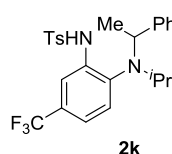

Yield 59%; purified by column chromatography (silica gel, 8:1 *n*-hexane/AcOEt); colorless oil; IR (KBr)  $\nu$  3232, 2973, 1598, 1507, 1384, 1167, 947, 701 cm<sup>-1</sup>; <sup>1</sup>H NMR (400 MHz, CDCl<sub>3</sub>, 50 °C):  $\delta$  0.72 (d,  $J$  = 6.4 Hz, 3H, CH(CH<sub>3</sub>)<sub>2</sub>), 0.83 (d,  $J$  = 6.4 Hz, 3H, CH(CH<sub>3</sub>)Ph), 0.92 (d,  $J$  = 6.4 Hz, 3H, CH(CH<sub>3</sub>)<sub>2</sub>), 2.34 (s, 3H, ArCH<sub>3</sub>), 3.20 (septet,  $J$  = 6.4 Hz, 1H, CH(CH<sub>3</sub>)<sub>2</sub>), 4.26 (q,  $J$  = 6.4 Hz, 1H, CH(CH<sub>3</sub>)Ph), 7.22–7.37 (m, 9H, ArH), 7.80 (d,  $J$  = 8.0 Hz, 2H, ArH), 7.87 (s, 1H, ArH), 8.73 (brs, 1H, NH); <sup>13</sup>C NMR (100 MHz, CDCl<sub>3</sub>, 50 °C):  $\delta$  17.3 (CH<sub>3</sub>), 20.6 (CH<sub>3</sub>), 21.4 (CH<sub>3</sub>), 21.6 (CH<sub>3</sub>), 50.7 (CH), 60.3 (CH), 112.8 (q,  $J$  = 3.8 Hz, CH), 118.9 (q,  $J$  = 3.8 Hz, CH), 123.8 (q,  $J$  = 270 Hz, CF<sub>3</sub>), 127.2 (CH), 127.3 (CH), 127.6 (CH), 128.9 (CH), 129.0 (q,  $J$  = 32 Hz, C), 129.3 (CH), 129.7 (CH), 136.9 (C), 137.3 (C), 138.9 (C), 143.7 (C), 144.2 (C); HRMS (FAB) calcd for C<sub>25</sub>H<sub>28</sub>F<sub>3</sub>N<sub>2</sub>O<sub>2</sub>S [M+H]<sup>+</sup> 477.1818, found 477.1819.

### ***N*-Cyclohexyl-*N*-(1-phenylethyl)-2-(tosylamido)-*p*-toluidine (2l)**

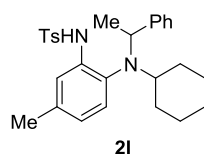

Yield 68%; purified by column chromatography (silica gel, 8:1 *n*-hexane/AcOEt); colorless oil; IR (KBr)  $\nu$  3220, 2930, 1504, 1370, 1167, 1090, 911, 734 cm<sup>-1</sup>; <sup>1</sup>H NMR (400 MHz, CDCl<sub>3</sub>, 60 °C):  $\delta$  0.65 (ddd,  $J$  = 24.4, 12.4, 3.6 Hz, 1H, <sup>c</sup>Hex), 0.83–0.99 (m, 7H, CH(CH<sub>3</sub>)Ph and <sup>c</sup>Hex), 1.38–1.47 (m, 2H, <sup>c</sup>Hex), 1.58–1.60 (m, 2H, <sup>c</sup>Hex), 1.95–1.98 (m, 1H, <sup>c</sup>Hex), 2.30 (s, 3H,

ArCH<sub>3</sub>), 2.33 (s, 3H, ArCH<sub>3</sub>), 2.64-2.70 (m, 1H, <sup>c</sup>Hex), 4.29 (q, *J* = 6.4 Hz, 1H, CH(CH<sub>3</sub>)Ph), 6.74 (d, *J* = 8.0 Hz, 1H, ArH), 6.98 (d, *J* = 8.0 Hz, 1H, ArH), 7.19 (d, *J* = 8.0 Hz, 2H, ArH), 7.24–7.32 (m, 5H, ArH), 7.40 (s, 1H, ArH), 7.78 (d, *J* = 8.0 Hz, 2H, ArH), 8.63 (brs, 1H, NH); <sup>13</sup>C NMR (100 MHz, CDCl<sub>3</sub>, 60 °C): δ 14.0 (CH<sub>3</sub>), 21.3 (CH<sub>2</sub>), 21.4 (CH<sub>2</sub>), 21.6 (CH<sub>3</sub>), 25.7 (CH<sub>2</sub>), 25.8 (CH<sub>2</sub>), 26.0 (CH<sub>2</sub>), 31.6 (CH<sub>3</sub>), 59.6 (CH), 59.7 (CH), 116.4 (CH), 123.0 (CH), 127.2 (CH), 127.3 (CH), 127.3 (CH), 128.6 (CH), 128.9 (CH), 129.5 (CH), 131.8 (C), 136.5 (C), 137.8 (C), 137.9 (C), 143.5 (C); HRMS (FAB) calcd for C<sub>28</sub>H<sub>35</sub>N<sub>2</sub>O<sub>2</sub>S [M+H]<sup>+</sup> 463.2414, found 463.2417.

**(R)-N-Isopropyl-N-[1-(*tert*-butyldimethylsilyloxy)propan-2-yl]-2-(tosylamido)-*p*-toluidine (2m)**

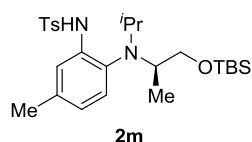

TsN=IPh (1.5 equiv) was used. Yield 79%; purified by column chromatography (silica gel, 8:1 *n*-hexane/AcOEt); colorless oil; [α]<sub>D</sub><sup>24</sup> = -36.8 (*c* 0.62, CHCl<sub>3</sub>); IR (KBr) ν 3202, 2928, 1505, 1384, 1169, 1091, 835 cm<sup>-1</sup>; <sup>1</sup>H NMR (400 MHz, CDCl<sub>3</sub>, 60 °C): δ 0.06 (s, 6H, SiCH<sub>3</sub>), 0.84–0.88 (m, 18H, CH(CH<sub>3</sub>)<sub>2</sub>, CH(CH<sub>3</sub>)CH<sub>2</sub> and Si<sup>t</sup>Bu), 2.27 (s, 3H, ArCH<sub>3</sub>), 2.35 (s, 3H, ArCH<sub>3</sub>), 3.24–3.29 (m, 3H, CH(CH<sub>3</sub>)<sub>2</sub>, CH(CH<sub>3</sub>)CH<sub>2</sub>), 3.41–3.45 (m, 1H, CH(CH<sub>3</sub>)CH<sub>2</sub>), 6.71 (d, *J* = 8.0 Hz, 1H, ArH), 6.99 (d, *J* = 8.0 Hz, 1H, ArH), 7.20 (d, *J* = 8.0 Hz, 2H, ArH), 7.38 (s, 1H, ArH), 7.78 (d, *J* = 8.0 Hz, 2H, ArH), 8.59 (brs, 1H, NH); <sup>13</sup>C NMR (100 MHz, CDCl<sub>3</sub>, 60 °C): δ -5.31 (CH<sub>3</sub>), -5.28 (CH<sub>3</sub>), 15.7 (CH<sub>3</sub>), 18.4 (C), 21.2 (CH<sub>3</sub>), 21.4 (CH<sub>3</sub>), 21.4 (CH<sub>3</sub>), 26.1 (CH<sub>3</sub>), 51.2 (CH), 56.6 (CH), 65.9 (CH<sub>2</sub>), 117.0 (CH), 123.0 (CH), 127.2 (CH), 129.4 (CH), 129.6 (CH), 131.9 (C), 136.5 (C), 138.0 (C), 138.2 (C), 143.3 (C); HRMS (FAB) calcd for C<sub>26</sub>H<sub>43</sub>N<sub>2</sub>O<sub>3</sub>SSi [M+H]<sup>+</sup> 491.2758, found 491.2765.

**(R)-N-Isopropyl-N-[1-(methoxymethoxy)propan-2-yl]-2-(tosylamido)-*p*-toluidine (2n)**

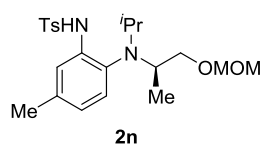

TsN=IPh (1.5 equiv) was used. Yield 77%; purified by column chromatography (silica gel, 8:1 to 6:1 *n*-hexane/AcOEt); colorless oil; [α]<sub>D</sub><sup>24</sup> = -26.6 (*c* 0.52, CHCl<sub>3</sub>); IR (KBr) ν 3163, 2970, 1506, 1384, 1159, 1043, 814 cm<sup>-1</sup>; <sup>1</sup>H NMR (400 MHz, CDCl<sub>3</sub>, 60 °C): δ 0.86 (d, *J* = 6.0 Hz, 3H, CH(CH<sub>3</sub>)CH<sub>2</sub>), 0.94 (d, *J* = 6.4 Hz, 6H, CH(CH<sub>3</sub>)<sub>2</sub>), 2.23 (s, 3H, ArCH<sub>3</sub>), 2.34 (s, 3H, ArCH<sub>3</sub>), 3.33–3.40 (m, 7H, CH(CH<sub>3</sub>)<sub>2</sub>, CH(CH<sub>3</sub>)CH<sub>2</sub>, OCH<sub>3</sub>), 4.68 (d, *J* = 6.4 Hz, 1H, OCHHOCH<sub>3</sub>), 4.72 (d, *J* = 6.4 Hz, 1H, OCHHOCH<sub>3</sub>), 6.70 (dd, *J* = 8.0, 2.0 Hz, 1H, ArH), 6.98 (d, *J* = 8.0 Hz, 1H, ArH), 7.20 (d, *J* = 8.0 Hz, 2H, ArH), 7.38 (d, *J* = 2.0 Hz, 1H, ArH), 7.79 (d, *J* = 8.0 Hz, 2H, ArH), 9.03 (brs, 1H, NH); <sup>13</sup>C NMR (100 MHz, CDCl<sub>3</sub>, 60 °C): δ 15.4 (CH<sub>3</sub>), 21.3 (CH<sub>3</sub>), 21.4 (CH<sub>3</sub>), 21.9 (CH<sub>3</sub>), 55.5 (CH<sub>3</sub>), 69.6 (CH<sub>2</sub>), 96.8 (CH<sub>2</sub>), 116.9

(CH), 122.9 (CH), 127.3 (CH), 129.4 (CH), 129.9 (CH), 131.8 (C), 136.6 (C), 138.0 (C), 138.3 (C), 143.3 (C) (Two of CH–N were not found); HRMS (FAB) calcd for C<sub>22</sub>H<sub>33</sub>N<sub>2</sub>O<sub>4</sub>S [M+H]<sup>+</sup> 421.2156, found 421.2159.

**(R)-N-Isopropyl-N-[1-(*p*-methoxybenzyloxy)propan-2-yl]-2-(tosylamido)-*p*-toluidine (2o)**

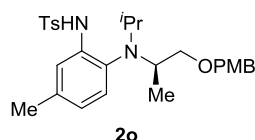

Yield 76%; purified by column chromatography (silica gel, 8:1 to 6:1 *n*-hexane/AcOEt); colorless oil;  $[\alpha]_D^{24} = -30.2$  (*c* 0.84, CHCl<sub>3</sub>); IR (KBr)  $\nu$  3134, 2969, 1510, 1380, 1246, 1159, 1091, 814, 706 cm<sup>-1</sup>; <sup>1</sup>H NMR (400 MHz, CDCl<sub>3</sub>, 60 °C):  $\delta$  0.81–0.91 (m, 9H, CH(CH<sub>3</sub>)<sub>2</sub> and CH(CH<sub>3</sub>)CH<sub>2</sub>), 2.27 (s, 3H, ArCH<sub>3</sub>), 2.33 (s, 3H, ArCH<sub>3</sub>), 3.12–3.25 (m, 4H, CH(CH<sub>3</sub>)<sub>2</sub>, CH(CH<sub>3</sub>)CH<sub>2</sub>), 3.79 (s, 3H, OCH<sub>3</sub>), 4.46 (d, *J* = 12.0 Hz, 1H, OCHHOAr), 4.56 (d, *J* = 12.0 Hz, 1H, OCHHOAr), 6.68 (d, *J* = 8.0 Hz, 1H, ArH), 6.87 (d, *J* = 8.0 Hz, 2H, ArH), 6.95 (d, *J* = 8.0 Hz, 1H, ArH), 7.17 (d, *J* = 8.0 Hz, 2H, ArH), 7.28 (d, *J* = 8.0 Hz, 2H, ArH), 7.41 (s, 1H, ArH), 7.78 (d, *J* = 8.0 Hz, 2H, ArH), 9.10 (brs, 1H, NH); <sup>13</sup>C NMR (100 MHz, CDCl<sub>3</sub>, 60 °C):  $\delta$  15.5 (CH<sub>3</sub>), 21.3 (CH<sub>3</sub>), 21.4 (CH<sub>3</sub>), 21.9 (CH<sub>3</sub>), 55.3 (CH<sub>3</sub>), 71.9 (CH<sub>2</sub>), 72.7 (CH<sub>2</sub>), 113.9 (CH), 117.0 (CH), 122.9 (CH), 127.3 (CH), 129.3 (CH), 129.6 (CH), 130.0 (CH), 130.5 (C), 132.1 (C), 136.5 (C), 138.0 (C), 138.4 (C), 143.2 (C), 159.4 (C) (Two of CH–N were not found); HRMS (FAB) calcd for C<sub>28</sub>H<sub>37</sub>N<sub>2</sub>O<sub>4</sub>S [M+H]<sup>+</sup> 497.2469, found 497.2473.

**N-Isopropyl-N-(1-phenylethyl)-1-(tosylamido)naphthalen-2-amine (2p)**

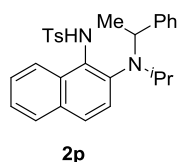

Yield 86%; purified by column chromatography (silica gel, 8:1 *n*-hexane/AcOEt); colorless amorphous; IR (KBr)  $\nu$  2972, 1596, 1493, 1454, 1379, 1301, 1153, 1092, 911, 812, 734 cm<sup>-1</sup>; <sup>1</sup>H NMR (400 MHz, CDCl<sub>3</sub>, 50 °C):  $\delta$  0.87 (d, *J* = 6.4 Hz, 3H, CH(CH<sub>3</sub>)<sub>2</sub>), 0.98 (d, *J* = 6.4 Hz, 3H, CH(CH<sub>3</sub>)Ph), 1.11 (d, *J* = 6.4 Hz, 3H, CH(CH<sub>3</sub>)<sub>2</sub>), 2.45 (s, 3H, ArCH<sub>3</sub>), 3.31 (septet, *J* = 6.4 Hz, 1H, CH(CH<sub>3</sub>)<sub>2</sub>), 4.46 (q, *J* = 6.4 Hz, 1H, CH(CH<sub>3</sub>)Ph), 7.23 (t, *J* = 6.8 Hz, 1H, ArH), 7.27 (t, *J* = 7.2 Hz, 1H, ArH), 7.31–7.42 (m, 6H, ArH), 7.47 (d, *J* = 7.2 Hz, 2H, ArH), 7.63 (d, *J* = 8.0 Hz, 1H, ArH), 7.76 (d, *J* = 8.0 Hz, 2H, ArH), 7.89 (d, *J* = 8.0 Hz, 2H, ArH), 8.96 (brs, 1H, NH); <sup>13</sup>C NMR (100 MHz, CDCl<sub>3</sub>, 50 °C):  $\delta$  17.5 (CH<sub>3</sub>), 21.4 (CH<sub>3</sub>), 21.5 (CH<sub>3</sub>), 21.9 (CH<sub>3</sub>), 51.3 (CH), 60.2 (CH), 124.7 (CH), 125.3 (CH), 125.8 (CH), 126.1 (CH), 126.2 (CH), 127.3 (CH), 127.4 (CH), 127.6 (CH), 127.8 (CH), 127.9 (C), 128.7 (CH), 129.5 (CH), 132.8 (C), 135.0 (C), 135.4 (C), 139.3 (C), 143.6 (C), 144.8 (C); HRMS (FAB) calcd for C<sub>28</sub>H<sub>31</sub>N<sub>2</sub>O<sub>2</sub>S [M+H]<sup>+</sup> 459.2101, found 459.2102.



***N*-Isopropyl-*N*-(1-phenylethyl)-5-(tosylamido)quinolin-6-amine (**2q**)**

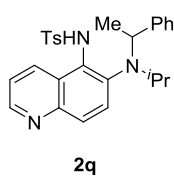

Yield 79%; purified by column chromatography (silica gel, 2:1 to 3:2 *n*-hexane/AcOEt); colorless amorphous; IR (KBr)  $\nu$  2972, 1590, 1564, 1494, 1378, 1300, 1157, 1091, 908, 813, 763  $\text{cm}^{-1}$ ;  $^1\text{H}$  NMR (400 MHz,  $\text{CDCl}_3$ , 60  $^\circ\text{C}$ ):  $\delta$  0.89 (d,  $J = 6.4$  Hz, 3H,  $\text{CH}(\text{CH}_3)_2$ ), 0.95 (d,  $J = 6.4$  Hz, 3H,  $\text{CH}(\text{CH}_3)\text{Ph}$ ), 1.06 (d,  $J = 6.4$  Hz, 3H,  $\text{CH}(\text{CH}_3)_2$ ), 2.43 (s, 3H,  $\text{ArCH}_3$ ), 3.31 (septet,  $J = 6.4$  Hz, 1H,  $\text{CH}(\text{CH}_3)_2$ ), 4.45 (q,  $J = 6.4$  Hz, 1H,  $\text{CH}(\text{CH}_3)\text{Ph}$ ), 7.20 (dd,  $J = 8.0, 4.0$  Hz, 1H,  $\text{ArH}$ ), 7.27–7.32 (m, 5H,  $\text{ArH}$ ), 7.36 (t,  $J = 7.2$  Hz, 2H,  $\text{ArH}$ ), 7.61 (d,  $J = 8.8$  Hz, 1H,  $\text{ArH}$ ), 7.79 (d,  $J = 8.0$  Hz, 2H,  $\text{ArH}$ ), 7.91 (d,  $J = 9.6$  Hz, 1H,  $\text{ArH}$ ), 8.27 (d,  $J = 8.0$  Hz, 1H,  $\text{ArH}$ ), 8.79 (brs, 1H,  $\text{NH}$ ), 8.83 (dd,  $J = 4.0, 1.6$  Hz, 1H,  $\text{ArH}$ );  $^{13}\text{C}$  NMR (100 MHz,  $\text{CDCl}_3$ , 60  $^\circ\text{C}$ ):  $\delta$  17.9 ( $\text{CH}_3$ ), 21.3 ( $\text{CH}_3$ ), 21.4 ( $\text{CH}_3$ ), 21.5 ( $\text{CH}_3$ ), 51.4 ( $\text{CH}$ ), 60.0 ( $\text{CH}$ ), 120.1 ( $\text{CH}$ ), 123.3 ( $\text{C}$ ), 126.1 ( $\text{CH}$ ), 127.3 ( $\text{CH}$ ), 127.4 ( $\text{CH}$ ), 127.6 ( $\text{CH}$ ), 128.7 ( $\text{CH}$ ), 129.7 ( $\text{CH}$ ), 129.7 ( $\text{CH}$ ), 134.5 ( $\text{CH}$ ), 134.9 ( $\text{C}$ ), 135.4 ( $\text{C}$ ), 138.7 ( $\text{C}$ ), 144.0 ( $\text{C}$ ), 144.3 ( $\text{C}$ ), 147.2 ( $\text{C}$ ), 150.2 ( $\text{CH}$ ); HRMS (FAB) calcd for  $\text{C}_{27}\text{H}_{30}\text{N}_3\text{O}_2\text{S}$   $[\text{M}+\text{H}]^+$  460.2053, found 460.2057.

***N*-Isopropyl-*N*-(1-phenylethyl)-3,4-dimethyl-2-(tosylamido)aniline (**2r**) and *N*-isopropyl-*N*-(1-phenylethyl)-4,5-dimethyl-2-(tosylamido)aniline (**2r'**)**

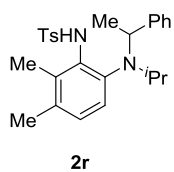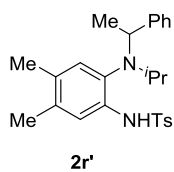

Yield 83% (**2r**:**2r'** = 70:30); purified by column chromatography (silica gel, 8:1 *n*-hexane/AcOEt); colorless amorphous; IR (KBr)  $\nu$  1971, 1493, 1323, 1154, 1092, 702  $\text{cm}^{-1}$ ;  $^1\text{H}$  NMR (400 MHz,  $\text{CDCl}_3$ , ):  $\delta$  0.68 (d,  $J = 6.4$  Hz, 3H,  $\text{CH}(\text{CH}_3)_2$  for **2r'**), 0.77 (d,  $J = 6.4$  Hz, 3H,  $\text{CH}(\text{CH}_3)\text{Ph}$  for **2r'**), 0.85 (d,  $J = 6.4$  Hz, 3H,  $\text{CH}(\text{CH}_3)_2$  for **2r**), 0.90 (d,  $J = 6.4$  Hz, 3H,  $\text{CH}(\text{CH}_3)_2$  for **2r'**), 0.97 (d,  $J = 6.4$  Hz, 3H,  $\text{CH}(\text{CH}_3)\text{Ph}$  for **2r**), 1.15 (d,  $J = 6.4$  Hz, 3H,  $\text{CH}(\text{CH}_3)_2$  for **2r**), 1.96 (s, 3H,  $\text{ArCH}_3$  for **2r**), 2.15 (s, 3H,  $\text{ArCH}_3$  for **2r'**), 2.21 (s, 3H,  $\text{ArCH}_3$  for **2r'**), 2.22 (s, 3H,  $\text{ArCH}_3$  for **2r**), 2.32 (s, 3H,  $\text{ArCH}_3$  for **2r'**), 2.44 (s, 3H,  $\text{ArCH}_3$  for **2r**), 3.11 (septet,  $J = 6.4$  Hz, 1H,  $\text{CH}(\text{CH}_3)_2$  for **2r'**), 3.23 (septet,  $J = 6.4$  Hz, 1H,  $\text{CH}(\text{CH}_3)_2$  for **2r**), 4.20 (d,  $J = 6.4$  Hz, 1H,  $\text{CH}(\text{CH}_3)\text{Ph}$  for **2r'**), 4.33 (d,  $J = 6.4$  Hz, 1H,  $\text{CH}(\text{CH}_3)\text{Ph}$  for **2r**), 6.86 (s, 1H,  $\text{ArH}$  for **2r'**), 6.93 (d,  $J = 8.0$  Hz, 1H,  $\text{ArH}$  for **2r**), 7.03 (d,  $J = 8.0$  Hz, 1H,  $\text{ArH}$  for **2r**), 7.18 (d,  $J = 8.0$  Hz, 2H,  $\text{ArH}$  for **2r'**), 7.23–7.37 (m, 5H,  $\text{ArH}$  for **2r** and 6H,  $\text{ArH}$  for **2r'**), 7.45 (d,  $J = 8.0$  Hz, 2H,  $\text{ArH}$  for **2r**), 7.80 (d,  $J = 8.0$  Hz, 2H,  $\text{ArH}$  for **2r'**), 7.89 (d,  $J = 8.0$  Hz, 2H,  $\text{ArH}$  for **2r**), 8.49 (brs, 1H,  $\text{NH}$  for **2r'**), 8.91 (brs, 1H,  $\text{NH}$  for **2r**); HRMS (FAB) calcd for  $\text{C}_{26}\text{H}_{33}\text{N}_2\text{O}_2\text{S}$   $[\text{M}+\text{H}]^+$  437.2257, found 437.2261.

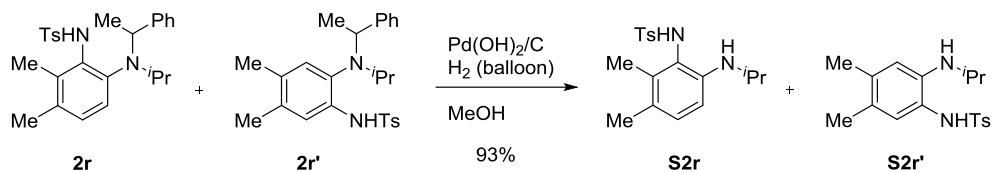

The structures of **2r** and **2r'** were assigned after removal of their 1-phenylethyl groups. A solution of **2r** and **2r'** (70:30, 53.8 mg) in MeOH (1.0 mL) was stirred with 20% Pd(OH)<sub>2</sub>/C (27 mg) under 1 atm of H<sub>2</sub> at room temperature for 6 h. The catalyst was removed by filtration, and the filtrate was concentrated in vacuo. The residue was purified by column chromatography (silica gel, 3:1 *n*-hexane/AcOEt) to give a mixture of **S2r** and **S2r'** (65:35, 38.1 mg, 93%) as a colorless oil: IR (KBr)  $\nu$  3271, 2966, 1607, 1513, 1325, 1159, 1092, 916, 813 cm<sup>-1</sup>; <sup>1</sup>H NMR (400 MHz, CD<sub>3</sub>OD):  $\delta$  0.91 (d,  $J = 6.4$  Hz, 6H, CH(CH<sub>3</sub>)<sub>2</sub> for **S2r**), 0.97 (d,  $J = 6.4$  Hz, 6H, CH(CH<sub>3</sub>)<sub>2</sub> for **S2r'**), 1.65 (s, 3H, ArCH<sub>3</sub> for **S2r**), 1.83 (s, 3H, ArCH<sub>3</sub> for **S2r'**), 1.94 (s, 3H, ArCH<sub>3</sub> for **S2r**), 2.03 (s, 3H, ArCH<sub>3</sub> for **S2r'**), 2.30 (s, 3H, ArCH<sub>3</sub> for **S2r'**), 2.32 (s, 3H, ArCH<sub>3</sub> for **S2r**), 3.33 (septet,  $J = 6.4$  Hz, 1H, CH(CH<sub>3</sub>)<sub>2</sub> for **S2r**), 3.39 (septet,  $J = 6.4$  Hz, 1H, CH(CH<sub>3</sub>)<sub>2</sub> for **S2r'**), 6.20 (s, 1H, ArH for **S2r'**), 6.32 (d,  $J = 8.0$  Hz, 1H, ArH for **S2r**), 6.36 (s, 1H, ArH for **S2r'**), 6.79 (d,  $J = 8.0$  Hz, 1H, ArH for **S2r**), 7.20 (d,  $J = 8.0$  Hz, 2H, ArH for **S2r'**), 7.22 (d,  $J = 8.0$  Hz, 2H, ArH for **S2r**), 7.46 (d,  $J = 8.0$  Hz, 2H, ArH for **S2r'**), 7.50 (d,  $J = 8.0$  Hz, 2H, ArH for **S2r**); HRMS (FAB) calcd for C<sub>18</sub>H<sub>25</sub>N<sub>2</sub>O<sub>2</sub>S [M+H]<sup>+</sup> 333.1631, found 333.1643.

***N*-Isopropyl-*N*-(1-phenylethyl)-4-methyl-3-methoxycarbonyl-2-(tosylamido)aniline (**2s**) and *N*-isopropyl-*N*-(1-phenylethyl)-4-methyl-5-methoxycarbonyl-2-(tosylamido)aniline (**2s'**)**

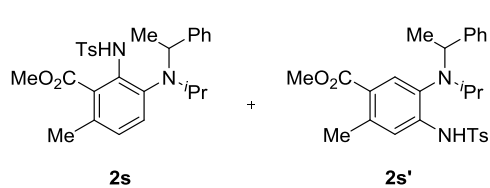

TsN=IPh (2.0 equiv) was used. Yield 78% (**2s**:**2s'** = 5:>95); **2s** and **2s'** were separable by column chromatography (silica gel, 6:1 to 4:1 *n*-hexane/AcOEt).

**2s**; colorless oil; <sup>1</sup>H NMR (300 MHz, CDCl<sub>3</sub>):  $\delta$  0.76 (d,  $J = 6.6$  Hz, 3H, CH(CH<sub>3</sub>)<sub>2</sub>), 0.78 (d,  $J = 6.6$  Hz, 3H, CH(CH<sub>3</sub>)<sub>2</sub>), 0.88 (d,  $J = 6.6$  Hz, 3H, CH(CH<sub>3</sub>)Ph), 2.36 (s, 3H, ArCH<sub>3</sub>), 2.39 (s, 3H, ArCH<sub>3</sub>), 3.11 (septet,  $J = 6.6$  Hz, 1H, CH(CH<sub>3</sub>)<sub>2</sub>), 3.67 (s, 3H, CO<sub>2</sub>CH<sub>3</sub>), 4.22 (q,  $J = 6.6$  Hz, 1H, CH(CH<sub>3</sub>)Ph), 6.96 (d,  $J = 8.1$  Hz, 1H, ArH), 7.15 (d,  $J = 8.1$  Hz, 1H, ArH), 7.23–7.36 (m, 7H, ArH), 7.81 (d,  $J = 8.1$  Hz, 2H, ArH), 9.10 (brs, 1H, NH).

**2s'**; colorless amorphous; IR (KBr)  $\nu$  3235, 2972, 1719, 1562, 1453, 1305, 1255, 1169, 1090, 894, 702 cm<sup>-1</sup>; <sup>1</sup>H NMR (400 MHz, CDCl<sub>3</sub>, 60°C):  $\delta$  0.72 (d,  $J = 6.4$  Hz, 3H, CH(CH<sub>3</sub>)<sub>2</sub>), 0.85–0.94 (m, 6H, CH(CH<sub>3</sub>)<sub>2</sub> and CH(CH<sub>3</sub>)Ph), 2.35 (s, 3H, ArCH<sub>3</sub>), 2.56 (s, 3H, ArCH<sub>3</sub>),

3.18 (septet,  $J = 6.4$  Hz, 1H,  $\text{CH}(\text{CH}_3)_2$ ), 3.85 (s, 3H,  $\text{CO}_2\text{CH}_3$ ), 4.27 (q,  $J = 6.4$  Hz, 1H,  $\text{CH}(\text{CH}_3)\text{Ph}$ ), 7.22 (d,  $J = 8.0$  Hz, 2H,  $\text{ArH}$ ), 7.26–7.34 (m, 5H,  $\text{ArH}$ ), 7.41 (s, 1H,  $\text{ArH}$ ), 7.73 (s, 1H,  $\text{ArH}$ ), 7.80 (d,  $J = 8.0$  Hz, 2H,  $\text{ArH}$ ), 8.75 (brs, 1H,  $\text{NH}$ );  $^{13}\text{C}$  NMR (100 MHz,  $\text{CDCl}_3$ , 60 °C):  $\delta$  20.7 ( $\text{CH}_3$ ), 21.4 ( $\text{CH}_3$ ), 21.7 ( $\text{CH}_3$ ), 22.0 ( $\text{CH}_3$ ), 50.5 (CH), 51.6 (CH), 60.3 ( $\text{CH}_3$ ), 118.0 (CH), 123.3 (CH), 127.2 (CH), 127.2 (C), 127.5 (CH), 128.8 (CH), 129.7 (CH), 131.0 (C), 131.4 (CH), 137.4 (C), 139.9 (C), 141.5 (C), 144.0 (C), 144.2 (C), 167.4 (C=O); HRMS (FAB) calcd for  $\text{C}_{27}\text{H}_{33}\text{N}_2\text{O}_4\text{S}$   $[\text{M}+\text{H}]^+$  481.2156, found 481.2158.

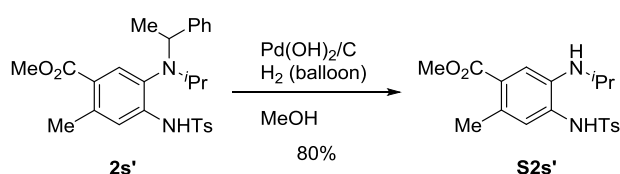

The structure of isolated **2s'** was assigned after removal of the 1-phenylethyl group. The reaction was carried out according to the procedure for hydrogenolysis of **2r** and **2r'**. **S2s'**; yield 80%; purified by column chromatography (silica gel, 3:1 *n*-hexane/AcOEt); colorless oil: IR (KBr)  $\nu$  3245, 2967, 1721, 1518, 1437, 1335, 1248, 1157, 909  $\text{cm}^{-1}$ ;  $^1\text{H}$  NMR (400 MHz,  $\text{CDCl}_3$ ):  $\delta$  1.08 (d,  $J = 6.4$  Hz, 6H,  $\text{CH}(\text{CH}_3)_2$ ), 2.32 (s, 3H,  $\text{ArCH}_3$ ), 2.41 (s, 3H,  $\text{ArCH}_3$ ), 3.47 (septet,  $J = 6.4$  Hz, 1H,  $\text{CH}(\text{CH}_3)_2$ ), 3.85 (s, 3H,  $\text{CO}_2\text{CH}_3$ ), 6.71 (s, 1H,  $\text{ArH}$ ), 7.23 (s, 1H,  $\text{ArH}$ ), 7.26 (d,  $J = 8.0$  Hz, 2H,  $\text{ArH}$ ), 7.65 (d,  $J = 8.0$  Hz, 2H,  $\text{ArH}$ );  $^{13}\text{C}$  NMR (100 MHz,  $\text{CDCl}_3$ ):  $\delta$  20.7 ( $\text{CH}_3$ ), 21.5 ( $\text{CH}_3$ ), 22.5 ( $\text{CH}_3$ ), 44.9 (CH), 51.8 ( $\text{CH}_3$ ), 116.9 (CH), 126.5 (C), 127.4 (CH), 128.4 (C), 128.9 (CH), 129.7 (CH), 129.9 (C), 136.1 (C), 140.1 (C), 144.1 (C), 167.9 (C=O); HRMS (FAB) calcd for  $\text{C}_{19}\text{H}_{25}\text{N}_2\text{O}_4\text{S}$   $[\text{M}+\text{H}]^+$  377.1530, found 377.1537.

#### ***N*-Isopropyl-*N*-(1-phenylethyl)-3,5-dibromo-4-methyl-2-(tosylamido)aniline (**2t**)**

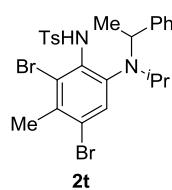

**2t**  $\text{TsN}=\text{IPh}$  (1.5 equiv) was used. Yield 59%; purified by column chromatography (silica gel, 4:1 *n*-hexane/AcOEt); colorless amorphous; IR (KBr)  $\nu$  3149, 2971, 1446, 1323, 1155, 1091, 900, 811, 735  $\text{cm}^{-1}$ ;  $^1\text{H}$  NMR (400 MHz,  $\text{CDCl}_3$ ):  $\delta$  0.88 (d,  $J = 6.4$  Hz, 3H,  $\text{CH}(\text{CH}_3)_2$ ), 1.01 (d,  $J = 6.4$  Hz, 3H,  $\text{CH}(\text{CH}_3)\text{Ph}$ ), 1.25 (d,  $J = 6.4$  Hz, 3H,  $\text{CH}(\text{CH}_3)_2$ ), 2.45 (s, 3H,  $\text{ArCH}_3$ ), 2.56 (s, 3H,  $\text{ArCH}_3$ ), 3.25 (septet,  $J = 6.4$  Hz, 1H,  $\text{CH}(\text{CH}_3)_2$ ), 4.36 (q,  $J = 6.4$  Hz, 1H,  $\text{CH}(\text{CH}_3)\text{Ph}$ ), 7.28–7.33 (m, 3H,  $\text{ArH}$ ), 7.39 (t,  $J = 8.0$  Hz, 2H,  $\text{ArH}$ ), 7.40–7.52 (m, 3H,  $\text{ArH}$ ), 7.92 (d,  $J = 8.0$  Hz, 2H,  $\text{ArH}$ ), 8.75 (brs, 1H,  $\text{NH}$ );  $^{13}\text{C}$  NMR (100 MHz,  $\text{CDCl}_3$ ):  $\delta$  16.7 ( $\text{CH}_3$ ), 21.1 ( $\text{CH}_3$ ), 21.6 ( $\text{CH}_3$ ), 21.8 ( $\text{CH}_3$ ), 24.7 ( $\text{CH}_3$ ), 50.8 (CH), 60.8 (CH), 119.5 (C), 119.7 (C), 127.0 (CH), 127.5 (CH), 127.6 (CH), 128.8 (CH), 128.9 (CH), 131.7 (CH), 137.1 (C), 138.5 (C), 139.4

(C), 139.8 (C), 143.1 (C), 143.8 (C); HRMS (FAB) calcd for  $C_{25}H_{29}Br_2N_2O_2S$   $[M+H]^+$  579.0311, found 579.0312.

### 3-*O*-Methyl-17-[4-(diisopropylamino)-3-(tosylamido)phenyl]estradiol (2u)

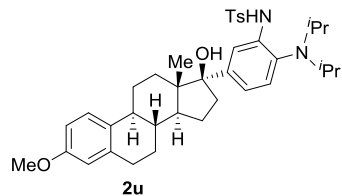

Yield 83%; purified by column chromatography (silica gel, 3:1 *n*-hexane/AcOEt); colorless solid; mp 100–103 °C,  $[\alpha]_D^{26} = +24.8$  (*c* 0.70,  $CHCl_3$ ); IR (KBr)  $\nu$  3543, 3199, 2931, 1499, 1379, 1237, 1162, 911, 813, 732  $cm^{-1}$ ;  $^1H$  NMR (400 MHz,  $CDCl_3$ , 60 °C):  $\delta$  0.53 (dt,  $J = 12.8, 4.0$  Hz, 1H, C16-*H*), 0.87–0.90 (m, 12H,  $CH(CH_3)_2$ ), 1.06 (s, 3H, C18-*H*), 1.27–1.64 (m, 7H), 1.81–1.91 (m, 3H), 2.06–2.14 (m, 2H), 2.32 (s, 3H, Ar $CH_3$ ), 2.32–2.39 (m, 1H), 2.79–2.86 (m, 2H), 3.38 (septet,  $J = 6.4$  Hz, 2H,  $CH(CH_3)_2$ ), 3.74 (s, 3H, O $CH_3$ ), 6.59 (d,  $J = 2.0$  Hz, 1H, Ar $H$ ), 6.65 (dd,  $J = 8.0, 2.0$  Hz, 1H, Ar $H$ ), 7.01–7.09 (m, 3H, Ar $H$ ), 7.19 (d,  $J = 8.0$  Hz, 2H, Ar $H$ ), 7.53 (s, 1H, Ar $H$ ), 7.80 (d,  $J = 8.0$  Hz, 2H, Ar $H$ ), 8.52 (brs, 1H, NH);  $^{13}C$  NMR (100 MHz,  $CDCl_3$ , 60 °C):  $\delta$  14.8 ( $CH_3$ ), 20.7 ( $CH_3$ ), 21.4 ( $CH_3$ ), 24.0 ( $CH_2$ ), 26.4 ( $CH_2$ ), 27.5 ( $CH_2$ ), 29.8 ( $CH_2$ ), 33.9 ( $CH_2$ ), 38.8 ( $CH_2$ ), 39.7 (CH), 43.6 (CH), 47.3 (C), 48.5 (CH), 50.1 (CH), 55.2 ( $CH_3$ ), 86.0 (C), 111.6 (CH), 114.0 (CH), 114.9 (CH), 121.4 (CH), 126.0 (CH), 127.1 (CH), 127.3 (CH), 129.5 (CH), 132.7 (C), 133.7 (C), 137.1 (C), 138.0 (C), 138.0 (C), 143.5 (C), 144.5 (C), 157.7 (C); HRMS (FAB) calcd for  $C_{38}H_{51}N_2O_4S$   $[M+H]^+$  631.3564, found 631.3570.

### *N,N*-Diisopropyl-4-bromo-2-(*p*-nosylamido)aniline (4d)

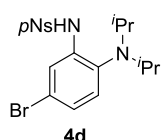

*p*NsN=IPh (1.5 equiv) was used instead of TsN=IPh under otherwise identical conditions to the typical procedure. Yield 93%; purified by column chromatography (silica gel, 3:1 to 2:1 *n*-hexane/AcOEt); yellow solid; mp 143–145 °C; IR (KBr)  $\nu$  3180, 2972, 1530, 1484, 1348, 1171, 1090, 939, 854, 736  $cm^{-1}$ ;  $^1H$  NMR (400 MHz,  $CDCl_3$ , 60 °C):  $\delta$  0.85 (d,  $J = 6.4$  Hz, 12H,  $CH(CH_3)_2$ ) 3.37 (septet,  $J = 6.4$  Hz, 2H,  $CH(CH_3)_2$ ), 6.99 (d,  $J = 8.0$  Hz, 1H, Ar $H$ ), 7.12 (dd,  $J = 8.0, 2.4$  Hz, 1H, Ar $H$ ), 7.77 (d,  $J = 2.4$  Hz, 1H, Ar $H$ ), 8.09 (d,  $J = 8.8$  Hz, 2H, Ar $H$ ), 8.30 (d,  $J = 8.8$  Hz, 2H, Ar $H$ ), 8.78 (s, 1H, NH);  $^{13}C$  NMR (100 MHz,  $CDCl_3$ , 60 °C):  $\delta$  20.4 ( $CH_3$ ), 50.2 (CH), 118.6 (CH), 120.3 (C), 124.3 (CH), 126.3 (CH), 128.3 (CH), 130.1 (CH), 134.2 (C), 138.5 (C), 145.7 (C), 150.6 (C); HRMS (FAB) calcd for  $C_{18}H_{23}BrN_3O_4S$   $[M+H]^+$  456.0587, found 456.0596.

### *N,N*-Diisopropyl-4-bromo-2-(2pyridinesulfonylamido)aniline (**5d**)

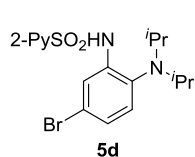

2rySO<sub>2</sub>N=IPh was used instead of TsN=IPh under otherwise identical conditions to the typical procedure. Yield 70%; purified by column chromatography (silica gel, 3:1 to 2:1 *n*-hexane/AcOEt); colorless solid; mp 108–110 °C; IR (KBr)  $\nu$  3194, 2972, 1585, 1485, 1382, 1177, 940, 869, 736 cm<sup>-1</sup>; <sup>1</sup>H NMR (400 MHz, CDCl<sub>3</sub>, 60 °C):  $\delta$  0.93 (d, *J* = 6.4 Hz, 12H, CH(CH<sub>3</sub>)<sub>2</sub>), 3.40 (septet, *J* = 6.4 Hz, 2H, CH(CH<sub>3</sub>)<sub>2</sub>), 6.96 (d, *J* = 8.0 Hz, 1H, ArH), 7.05 (dd, *J* = 8.0, 2.0 Hz, 1H, ArH), 7.42 (dd, *J* = 8.0, 4.8 Hz, 1H, ArH), 7.83 (d, *J* = 2.0 Hz, 1H, ArH), 7.87 (dt, *J* = 8.0, 1.6 Hz, 1H, ArH), 8.07 (d, *J* = 8.0 Hz, 1H, ArH), 8.61 (d, *J* = 4.8 Hz, 1H, ArH), 8.83 (brs, 1H, NH); <sup>13</sup>C NMR (100 MHz, CDCl<sub>3</sub>, 60 °C):  $\delta$  20.5 (CH<sub>3</sub>), 50.2 (CH), 118.8 (CH), 120.0 (C), 122.5 (CH), 125.5 (CH), 126.9 (CH), 129.8 (CH), 134.2 (C), 137.8 (CH), 139.3 (C), 150.1 (CH), 157.0 (C); HRMS (FAB) calcd for C<sub>17</sub>H<sub>23</sub>BrN<sub>3</sub>O<sub>2</sub>S [M+H]<sup>+</sup> 412.0689, found 412.0702.

### *N,N*-Diisopropyl-4-bromo-2-(trichloroethoxysulfonylamido)aniline (**6d**)

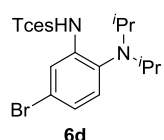

TcesN=IPh was used instead of TsN=IPh under otherwise identical conditions to the typical procedure. Yield 79%; purified by column chromatography (silica gel, 2:1 to 3:2 *n*-hexane/AcOEt); colorless oil; IR (KBr)  $\nu$  3566, 2978, 1597, 1480, 1395, 1147, 992, 843, 726 cm<sup>-1</sup>; <sup>1</sup>H NMR (400 MHz, CDCl<sub>3</sub>, 60 °C):  $\delta$  1.02 (d, *J* = 6.4 Hz, 12H, CH(CH<sub>3</sub>)<sub>2</sub>), 3.48 (septet, *J* = 6.4 Hz, 2H, CH(CH<sub>3</sub>)<sub>2</sub>), 4.66 (s, 2H, OCH<sub>2</sub>CCl<sub>3</sub>), 7.06 (d, *J* = 8.4 Hz, 1H, ArH), 7.18 (dd, *J* = 8.4, 2.0 Hz, 1H, ArH), 7.72 (d, *J* = 2.0 Hz, 1H, ArH); <sup>13</sup>C NMR (100 MHz, CDCl<sub>3</sub>, 60 °C):  $\delta$  20.5 (CH<sub>3</sub>), 50.6 (CH), 78.8 (CH<sub>2</sub>), 93.2 (C), 119.9 (CH), 120.5 (C), 126.4 (CH), 129.4 (CH), 133.8 (C), 138.6 (C); HRMS (FAB) calcd for C<sub>14</sub>H<sub>21</sub>BrCl<sub>3</sub>N<sub>2</sub>O<sub>3</sub>S [M+H]<sup>+</sup> 480.9516, found 480.9524.

## 7. Rh(II)-catalyzed C(sp<sup>2</sup>)-H amination of *N,N*-diisopropylaniline (**1v**)

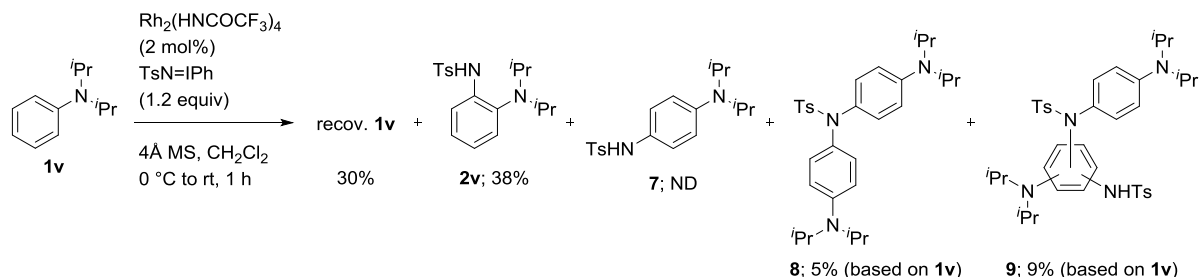

TsN=IPh (134 mg, 0.36 mmol) was added to a stirred mixture of *N,N*-diisopropylaniline (**1v**) (53.2 mg, 0.30 mmol), Rh<sub>2</sub>(HNCOCF<sub>3</sub>)<sub>4</sub> (3.9 mg, 0.006 mmol, 2 mol %) and 4Å MS (powder, 120 mg) in CH<sub>2</sub>Cl<sub>2</sub> (3.0 mL) at 0 °C under Ar atmosphere. After stirring at room temperature for 1 h, the whole mixture was filtered through a pad of Celite,

and the filtrate was evaporated in vacuo to furnish the crude product, which was purified by column chromatography (silica gel, 6:1 to 4:1 *n*-hexane/AcOEt) to give **2v** (39.9 mg, 38%), **8** (3.6 mg, 5%), and **9** (8.9 mg, 9%).

**2v**; colorless solid; mp 100–102 °C; IR (KBr)  $\nu$  3205, 2971, 1597, 1490, 1382, 1165, 1091, 934, 913, 754  $\text{cm}^{-1}$ ;  $^1\text{H}$  NMR (400 MHz,  $\text{CDCl}_3$ , 60 °C):  $\delta$  0.87 (d,  $J = 6.4$  Hz, 12H,  $\text{CH}(\text{CH}_3)_2$ ), 2.34 (s, 3H,  $\text{ArCH}_3$ ), 3.37 (septet,  $J = 6.4$  Hz, 2H,  $\text{CH}(\text{CH}_3)_2$ ), 6.91 (dt,  $J = 8.0$ , 2.0 Hz, 1H,  $\text{ArH}$ ), 7.08–7.11 (m, 2H,  $\text{ArH}$ ), 7.20 (d,  $J = 8.0$  Hz, 2H,  $\text{ArH}$ ), 7.56 (dd,  $J = 8.0$ , 2.0 Hz, 1H,  $\text{ArH}$ ), 7.78 (d,  $J = 8.0$  Hz, 2H,  $\text{ArH}$ ), 8.61 (s, 1H,  $\text{NH}$ );  $^{13}\text{C}$  NMR (100 MHz,  $\text{CDCl}_3$ , 60 °C):  $\delta$  20.5 ( $\text{CH}_3$ ), 21.3 ( $\text{CH}_3$ ), 50.1 (CH), 115.6 (CH), 122.3 (CH), 126.5 (CH), 127.2 (CH), 128.5 (CH), 129.5 (CH), 135.1 (C), 137.7 (C), 138.1 (C), 143.5 (C); HRMS (FAB) calcd for  $\text{C}_{19}\text{H}_{27}\text{N}_2\text{O}_2\text{S}$   $[\text{M}+\text{H}]^+$  347.1788, found 347.1784.

**8**; colorless amorphous; IR (KBr)  $\nu$  2969, 1603, 1509, 1350, 1290, 1163, 814  $\text{cm}^{-1}$ ;  $^1\text{H}$  NMR (400 MHz,  $\text{CDCl}_3$ ):  $\delta$  1.20 (d,  $J = 6.4$  Hz, 24H,  $\text{CH}(\text{CH}_3)_2$ ), 2.44 (s, 3H,  $\text{ArCH}_3$ ), 3.76 (septet,  $J = 6.4$  Hz, 4H,  $\text{CH}(\text{CH}_3)_2$ ), 6.71 (d,  $J = 9.2$  Hz, 4H,  $\text{ArH}$ ), 7.04 (d,  $J = 9.2$  Hz, 4H,  $\text{ArH}$ ), 7.25 (d,  $J = 8.0$  Hz, 2H,  $\text{ArH}$ ), 7.59 (d,  $J = 8.0$  Hz, 2H,  $\text{ArH}$ );  $^{13}\text{C}$  NMR (100 MHz,  $\text{CDCl}_3$ ):  $\delta$  21.2 ( $\text{CH}_3$ ), 21.6 ( $\text{CH}_3$ ), 47.4 (CH), 117.3 (CH), 127.9 (CH), 128.8 (CH), 129.2 (CH), 131.2 (C), 138.2 (C), 142.7 (C), 147.2 (C); HRMS (FAB) calcd for  $\text{C}_{31}\text{H}_{44}\text{N}_3\text{O}_2\text{S}$   $[\text{M}+\text{H}]^+$  522.3149, found 522.3157.

**9**; colorless amorphous; IR (KBr)  $\nu$  3198, 2971, 1602, 1512, 1352, 1166, 1090, 1011, 911, 813  $\text{cm}^{-1}$ ;  $^1\text{H}$  NMR (400 MHz,  $\text{CDCl}_3$ , 60 °C):  $\delta$  0.79 (d,  $J = 6.4$  Hz, 12H,  $\text{CH}(\text{CH}_3)_2$ ), 1.25 (d,  $J = 6.4$  Hz, 12H,  $\text{CH}(\text{CH}_3)_2$ ), 2.30 (s, 3H,  $\text{ArCH}_3$ ), 2.42 (s, 3H,  $\text{ArCH}_3$ ), 3.28 (septet,  $J = 6.4$  Hz, 2H,  $\text{CH}(\text{CH}_3)_2$ ), 3.81 (septet,  $J = 6.4$  Hz, 2H,  $\text{CH}(\text{CH}_3)_2$ ), 6.76 (d,  $J = 8.0$  Hz, 2H,  $\text{ArH}$ ), 6.89 (dd,  $J = 8.0$ , 2.8 Hz, 1H,  $\text{ArH}$ ), 6.95 (d,  $J = 8.8$  Hz, 1H,  $\text{ArH}$ ), 7.01 (d,  $J = 8.8$  Hz, 2H,  $\text{ArH}$ ), 7.10 (d,  $J = 8.0$  Hz, 2H,  $\text{ArH}$ ), 7.24 (d,  $J = 8.8$  Hz, 2H,  $\text{ArH}$ ), 7.62–7.65 (m, 5H,  $\text{ArH}$ ), 8.42 (brs, 1H,  $\text{NH}$ );  $^{13}\text{C}$  NMR (100 MHz,  $\text{CDCl}_3$ ):  $\delta$  20.5 ( $\text{CH}_3$ ), 21.4 ( $\text{CH}_3$ ), 21.5 ( $\text{CH}_3$ ), 47.7 (CH), 50.1 (CH), 113.9 (CH), 117.4 (CH), 121.0 (CH), 127.4 (CH), 128.1 (CH), 128.6 (CH), 129.4 (CH), 129.8 (CH), 130.2 (CH), 133.9 (C), 137.0 (C), 137.9 (C), 138.2 (C), 140.8 (C), 142.0 (C), 143.2 (C), 143.5 (C), 148.0 (C); HRMS (FAB) calcd for  $\text{C}_{38}\text{H}_{51}\text{N}_4\text{O}_4\text{S}_2$   $[\text{M}+\text{H}]^+$  691.3346, found 691.3361.

**8. Typical procedure for Rh(II)-catalyzed *ortho* C–H amination of *papa*-unsubstituted *N,N*-dialkylanilines: Preparation of *N,N*-diisopropyl-5-*tert*-butyl-2-(tosylamido)aniline (**2w**)**

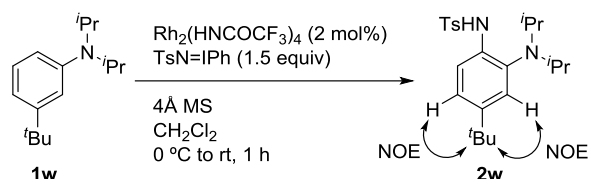

$\text{TsN=IPh}$  (56.0 mg, 0.15 mmol) was added to a stirred mixture of *N,N*-diisopropyl-3-*tert*-butylaniline (**1w**) (23.3 mg, 0.10 mmol),  $\text{Rh}_2(\text{HNCOCF}_3)_4$  (1.3 mg, 0.002 mmol, 2 mol %) and 4 Å MS (powder, 40 mg) in  $\text{CH}_2\text{Cl}_2$  (1.0 mL) at 0 °C under Ar atmosphere. After stirring at room temperature for 1 h, the whole mixture was filtered through a pad of Celite, and the filtrate was evaporated in vacuo to furnish the crude product, which was purified by column chromatography (silica gel, 8:1 *n*-hexane/AcOEt) to give 1,2-diaminobenzene **2w** (26.9 mg, 67%) as a colorless oil: IR (KBr)  $\nu$  3215, 2965, 1499, 1365, 1166, 1091, 889, 813  $\text{cm}^{-1}$ ;  $^1\text{H}$  NMR (400 MHz,  $\text{CD}_3\text{CN}$ , 60 °C):  $\delta$  0.77 (d,  $J = 6.4$  Hz, 12H,  $\text{CH}(\text{CH}_3)_2$ ), 1.15 (s, 9H, *t*Bu), 2.26 (s, 3H, Ar $\text{CH}_3$ ), 3.34 (septet,  $J = 6.4$  Hz, 2H,  $\text{CH}(\text{CH}_3)_2$ ), 7.08 (dd,  $J = 8.4, 2.0$  Hz, 1H, Ar $H$ ), 7.11 (d,  $J = 2.0$  Hz, 1H, Ar $H$ ), 7.21 (d,  $J = 8.4$  Hz, 2H, Ar $H$ ), 7.33 (d,  $J = 8.4$  Hz, 1H, Ar $H$ ), 7.70 (d,  $J = 8.0$  Hz, 2H, Ar $H$ ), 8.42 (brs, 1H, NH);  $^{13}\text{C}$  NMR (100 MHz,  $\text{CD}_3\text{CN}$ , 60 °C):  $\delta$  20.8 ( $\text{CH}_3$ ), 21.1 ( $\text{CH}_3$ ), 31.3 ( $\text{CH}_3$ ), 34.5 (C), 50.6 (CH), 115.3 (CH), 123.6 (CH), 126.8 (CH), 127.8 (CH), 130.3 (CH), 135.5 (C), 136.0 (C), 138.2 (C), 145.0 (C), 146.3 (C); HRMS (FAB) calcd for  $\text{C}_{23}\text{H}_{35}\text{N}_2\text{O}_2\text{S}$  [ $\text{M}+\text{H}$ ] $^+$  403.2414, found 403.2426.

***N,N*-Diisopropyl-5-[2-(methoxycarbonyl)propan-2-yl]-2-(tosylamido)aniline (**2x**)**

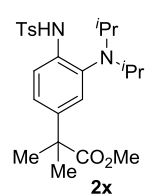

Yield 59%; purified by column chromatography (silica gel, 4:1 *n*-hexane/AcOEt); colorless solid; mp 104–106 °C; IR (KBr)  $\nu$  3212, 2972, 1731, 1499, 1382, 1254, 1165  $\text{cm}^{-1}$ ;  $^1\text{H}$  NMR (400 MHz,  $\text{CDCl}_3$ , 60 °C):  $\delta$  0.86 (d,  $J = 6.4$  Hz, 12H,  $\text{CH}(\text{CH}_3)_2$ ), 1.50 (s, 6H, ArC( $\text{CH}_3$ ) $_2$ ), 2.36 (s, 3H, Ar $\text{CH}_3$ ), 3.37 (septet,  $J = 6.4$  Hz, 2H,  $\text{CH}(\text{CH}_3)_2$ ), 3.60 (s, 3H,  $\text{CO}_2\text{CH}_3$ ), 7.06–7.09 (m, 2H, Ar $H$ ), 7.22 (d,  $J = 8.0$  Hz, 2H, Ar $H$ ), 7.45 (d,  $J = 8.0$  Hz, 1H, Ar $H$ ), 7.79 (d,  $J = 8.0$  Hz, 2H, Ar $H$ ), 8.47 (brs, 1H, NH);  $^{13}\text{C}$  NMR (100 MHz,  $\text{CDCl}_3$ , 60 °C):  $\delta$  20.6 ( $\text{CH}_3$ ), 21.4 ( $\text{CH}_3$ ), 26.4 ( $\text{CH}_3$ ), 46.1 (C), 50.2 (CH), 51.9 ( $\text{CH}_3$ ), 115.1 (CH), 123.4 (CH), 126.6 (CH), 127.2 (CH), 129.5 (CH), 134.7 (C), 136.5 (C), 137.9 (C), 138.8 (C), 143.6 (C), 177.0 (C=O); HRMS (FAB) calcd for  $\text{C}_{24}\text{H}_{35}\text{N}_2\text{O}_4\text{S}$  [ $\text{M}+\text{H}$ ] $^+$  447.2312, found 447.2317.

### *N,N*-Diisopropyl-3,5-dimethyl-2-(tosylamido)aniline (**2y**)

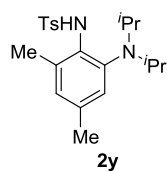

Yield 97%; purified by column chromatography (silica gel, 8:1 *n*-hexane/AcOEt); colorless oil; IR (KBr)  $\nu$  2970, 1474, 1322, 1154, 1093, 922, 812  $\text{cm}^{-1}$ ;  $^1\text{H}$  NMR (400 MHz,  $\text{CDCl}_3$ ):  $\delta$  1.03 (d,  $J = 6.4$  Hz, 12H,  $\text{CH}(\text{CH}_3)_2$ ), 1.97 (s, 3H, Ar $\text{CH}_3$ ), 2.25 (s, 3H, Ar $\text{CH}_3$ ), 2.43 (s, 3H, Ar $\text{CH}_3$ ), 3.45 (septet,  $J = 6.4$  Hz, 2H,  $\text{CH}(\text{CH}_3)_2$ ), 6.78 (d,  $J = 1.6$  Hz, 1H, Ar $\text{H}$ ), 6.87 (d,  $J = 1.6$  Hz, 1H, Ar $\text{H}$ ), 7.30 (d,  $J = 8.0$  Hz, 2H, Ar $\text{H}$ ), 7.88 (d,  $J = 8.0$  Hz, 2H, Ar $\text{H}$ ), 9.00 (brs, 1H, NH);  $^{13}\text{C}$  NMR (100 MHz,  $\text{CDCl}_3$ ):  $\delta$  20.6 (CH $_3$ ), 21.0 (CH $_3$ ), 21.3 (CH $_3$ ), 21.5 (CH $_3$ ), 50.0 (CH), 126.0 (CH), 126.7 (CH), 129.2 (CH), 129.6 (C), 129.7 (CH), 133.0 (C), 135.6 (C), 138.7 (C), 140.0 (C), 142.8 (C); HRMS (FAB) calcd for  $\text{C}_{21}\text{H}_{31}\text{N}_2\text{O}_2\text{S}$   $[\text{M}+\text{H}]^+$  375.2101, found 375.2102.

### *N,N*-Diisopropyl-3,5-dimethyl-2-(tosylamido)aniline (**2z**)

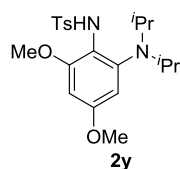

Yield 65%; purified by prep. TLC (silica gel, 10:1 *n*-hexane/AcOEt); beige solid: mp 115–117  $^\circ\text{C}$ ; IR (KBr)  $\nu$  3180, 2968, 1598, 1487, 1329, 1151, 915  $\text{cm}^{-1}$ ;  $^1\text{H}$  NMR (400 MHz,  $\text{CDCl}_3$ ):  $\delta$  1.06 (d,  $J = 6.4$  Hz, 12H,  $\text{CH}(\text{CH}_3)_2$ ), 2.43 (s, 3H, Ar $\text{CH}_3$ ), 3.39 (s, 3H, O $\text{CH}_3$ ), 3.49 (septet,  $J = 6.4$  Hz, 2H,  $\text{CH}(\text{CH}_3)_2$ ), 3.74 (s, 3H, O $\text{CH}_3$ ), 6.30 (d,  $J = 2.4$  Hz, 1H, Ar $\text{H}$ ), 6.41 (d,  $J = 2.4$  Hz, 1H, Ar $\text{H}$ ), 7.31 (d,  $J = 8.0$  Hz, 2H, Ar $\text{H}$ ), 7.88 (d,  $J = 8.0$  Hz, 2H, Ar $\text{H}$ ), 8.19 (brs, 1H, NH);  $^{13}\text{C}$  NMR (100 MHz,  $\text{CDCl}_3$ ):  $\delta$  20.6 (CH $_3$ ), 21.5 (CH $_3$ ), 50.0 (CH), 54.6 (CH $_3$ ), 55.4 (CH $_3$ ), 97.1 (CH), 105.4 (CH), 122.7 (C), 126.8 (CH), 128.7 (CH), 139.5 (C), 140.4 (C), 142.3 (C), 151.7 (C), 156.2 (C); HRMS (FAB) calcd for  $\text{C}_{21}\text{H}_{30}\text{N}_2\text{O}_4\text{S}$   $[\text{M}]^+$  406.1926, found 406.1926.

## 9. Competition experiments between *N,N*-diisopropyl-4-bromoaniline (**1d**) and 1,3,5-triisopropylbenzene (**10**)

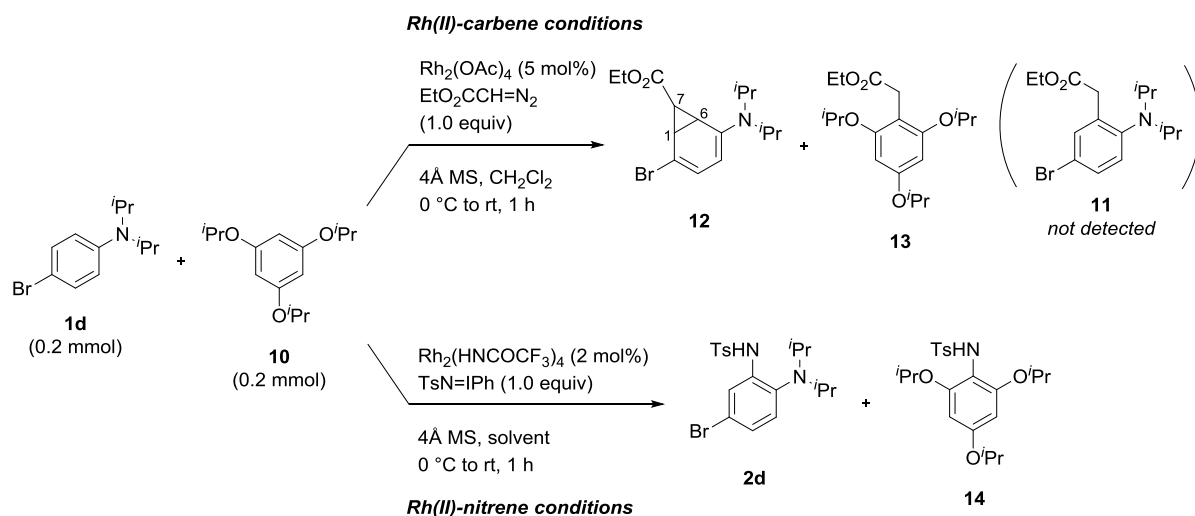



**Rh(II)-carbene conditions:** To a stirred mixture of **1d** (51.2 mg, 0.20 mmol), **10** (50.4 mg, 0.20 mmol), Rh<sub>2</sub>(OAc)<sub>4</sub> (2.2 mg, 0.005 mmol, 5 mol %) and 4Å MS (powder, 40 mg) in CH<sub>2</sub>Cl<sub>2</sub> (1.0 mL) was added a solution of ethyl diazoacetate in CH<sub>2</sub>Cl<sub>2</sub> (0.1 M, 1.0 mL, 0.10 mmol) dropwise at 0 °C under Ar atmosphere. After stirring at room temperature for 1 h, the whole mixture was filtered through a pad of Celite, and the filtrate was evaporated in vacuo to furnish the crude product, which was purified by column chromatography (silica gel, 10:1 to 6:1 *n*-hexane/AcOEt) to give cyclopropane **12** (5.5 mg, 16%) and C–H insertion product **13** (6.4 mg, 19%) with recovery of a mixture of starting materials (40.1 mg, **1d**:**10** = 51:49).

**12**; yellow amorphous; IR (KBr)  $\nu$  2975, 1685, 1529, 1490, 1252, 1215, 1044, 911, 750 cm<sup>-1</sup>; <sup>1</sup>H NMR (400 MHz, CDCl<sub>3</sub>):  $\delta$  1.25–1.38 (m, 16H, CH(CH<sub>3</sub>)<sub>2</sub>, C7-*H* and CO<sub>2</sub>CH<sub>2</sub>CH<sub>3</sub>), 3.72 (septet, *J* = 6.4 Hz, 2H, CH(CH<sub>3</sub>)<sub>2</sub>), 4.10–4.26 (m, 3H, C1-*H* and CO<sub>2</sub>CH<sub>2</sub>CH<sub>3</sub>), 5.06 (ddd, *J* = 8.0, 8.0, 1.2 Hz, 1H, C6-*H*), 6.06 (dd, *J* = 11.2, 1.2 Hz, 1H, C4-*H*), 7.07 (d, *J* = 11.2 Hz, 1H, C3-*H*); <sup>13</sup>C NMR (100 MHz, CDCl<sub>3</sub>):  $\delta$  14.5 (CH<sub>3</sub>), 22.3 (CH<sub>3</sub>), 36.7 (CH), 53.5 (CH), 59.8 (CH<sub>2</sub>), 104.4 (CH), 111.7 (CH), 116.5 (CH), 123.1 (CH), 131.7 (CH), 144.9 (C), 167.2 (C=O); HRMS (FAB) calcd for C<sub>16</sub>H<sub>24</sub>BrNO<sub>2</sub> [M]<sup>+</sup> 341.0990, found 341.0992.

**13**; colorless oil; IR (KBr)  $\nu$  2976, 1740, 1607, 1117, 1034, 815 cm<sup>-1</sup>; <sup>1</sup>H NMR (400 MHz, CDCl<sub>3</sub>):  $\delta$  1.24 (t, *J* = 7.2 Hz, 3H, OCH<sub>2</sub>CH<sub>3</sub>), 1.29 (d, *J* = 6.0 Hz, 12H, CH(CH<sub>3</sub>)<sub>2</sub>), 1.33 (d, *J* = 6.0 Hz, 6H, CH(CH<sub>3</sub>)<sub>2</sub>), 3.56 (s, 2H, ArCH<sub>2</sub>CO<sub>2</sub>), 4.12 (q, *J* = 7.2 Hz, 2H, OCH<sub>2</sub>CH<sub>3</sub>), 4.46 (septet, *J* = 6.0 Hz, 3H, CH(CH<sub>3</sub>)<sub>2</sub>), 6.09 (s, 2H, Ar*H*); <sup>13</sup>C NMR (100 MHz, CDCl<sub>3</sub>):  $\delta$  14.3 (CH<sub>3</sub>), 22.1 (CH<sub>3</sub>), 22.1 (CH<sub>3</sub>), 29.1 (CH<sub>2</sub>), 60.1 (CH<sub>2</sub>), 69.9 (CH), 70.5 (CH), 94.7 (CH), 106.9 (C), 157.3 (C), 158.1 (C), 172.8 (C=O); HRMS (FAB) calcd for C<sub>19</sub>H<sub>31</sub>O<sub>5</sub> [M+H]<sup>+</sup> 339.2166, found 339.2167.

**Rh(II)-nitrene conditions:** TsN=IPh (37.3 mg, 0.10 mmol) was added to a stirred mixture of **1d** (51.2 mg, 0.20 mmol), **10** (50.4 mg, 0.20 mmol), Rh<sub>2</sub>(HNCOCF<sub>3</sub>)<sub>4</sub> (1.3 mg, 0.002 mmol, 2 mol %) and 4Å MS (powder, 40 mg) in indicated solvent (1.0 mL) at 0 °C under Ar atmosphere. After stirring at room temperature for 1 h, the whole mixture was filtered through a pad of Celite, and the filtrate was evaporated in vacuo to furnish the crude product, which was purified by column chromatography (silica gel, 4:1 to 1:1 *n*-hexane/AcOEt) to give **2d** and **14** with recovery of a mixture of starting materials.

**14**; light yellow oil; IR (KBr)  $\nu$  3282, 2977, 1596, 1496, 1329, 1117, 811 cm<sup>-1</sup>; <sup>1</sup>H NMR (400 MHz, CDCl<sub>3</sub>):  $\delta$  1.14 (d, *J* = 6.0 Hz, 12H, CH(CH<sub>3</sub>)<sub>2</sub>), 1.32 (d, *J* = 6.0 Hz, 6H, CH(CH<sub>3</sub>)<sub>2</sub>), 2.39 (s, 3H, ArCH<sub>3</sub>), 4.38 (septet, *J* = 6.0 Hz, 2H, CH(CH<sub>3</sub>)<sub>2</sub>), 4.45 (septet, *J* = 6.0 Hz, 1H, CH(CH<sub>3</sub>)<sub>2</sub>), 6.00 (s, 2H, Ar*H*), 7.21 (d, *J* = 8.0 Hz, 2H, Ar*H*), 7.71 (d, *J* = 8.0 Hz, 2H, Ar*H*); <sup>13</sup>C NMR (100 MHz, CDCl<sub>3</sub>):  $\delta$  21.4 (CH<sub>3</sub>), 21.7 (CH<sub>3</sub>), 22.1 (CH<sub>3</sub>), 70.1 (CH), 70.6 (CH),

94.4 (CH), 108.6 (C), 127.5 (CH), 128.9 (CH), 138.6 (C), 142.6 (C), 154.9 (C), 157.7 (C); HRMS (FAB) calcd for C<sub>22</sub>H<sub>31</sub>NO<sub>5</sub>S [M]<sup>+</sup> 421.5520, found 421.1930.

## 10. Procedure for the synthesis of tetrahydroquinoxaline 15

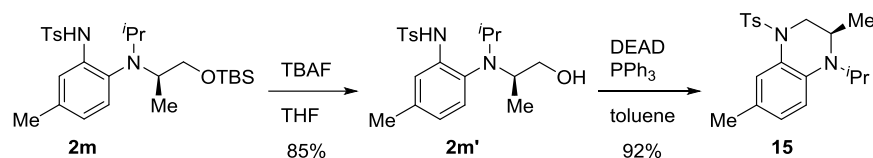

To a solution of **2m** (147 mg, 0.30 mmol) in THF (3.0 mL) was added a solution of TBAF in THF (1.0 M, 0.45 mL, 0.45 mmol) at room temperature under Ar atmosphere. After stirring for 1 h, water was added and the mixture was extracted with AcOEt. The combined organic extracts were successively washed with brine, and dried over anhydrous Na<sub>2</sub>SO<sub>4</sub>. Filtration and evaporation in vacuo furnished the crude product, which was purified by column chromatography (silica gel, 1:1 *n*-hexane/AcOEt) to give **2m'** (95.8 mg, 85%) as a colorless oil:  $[\alpha]_D^{20} = -44.8$  (*c* 1.03, CHCl<sub>3</sub>); IR (KBr)  $\nu$  3520, 3142, 2969, 1506, 1383, 1327, 1157, 1091, 814 cm<sup>-1</sup>; <sup>1</sup>H NMR (400 MHz, CDCl<sub>3</sub>, 60 °C):  $\delta$  0.85 (d, *J* = 6.4 Hz, 3H, CH(CH<sub>3</sub>)<sub>2</sub>), 0.94 (d, *J* = 4.8 Hz, 3H, CH(CH<sub>3</sub>)CH<sub>2</sub>), 0.98 (d, *J* = 6.4 Hz, 3H, CH(CH<sub>3</sub>)<sub>2</sub>), 2.27 (s, 3H, ArCH<sub>3</sub>), 2.36 (s, 3H, ArCH<sub>3</sub>), 3.30–3.38 (m, 4H, CH(CH<sub>3</sub>)<sub>2</sub> and CH(CH<sub>3</sub>)CH<sub>2</sub>O), 6.71 (d, *J* = 8.0 Hz, 1H, ArH), 6.98 (d, *J* = 8.0 Hz, 1H, ArH), 7.22 (d, *J* = 8.0 Hz, 2H, ArH), 7.37 (s, 1H, ArH), 7.83 (d, *J* = 8.0 Hz, 2H, ArH), 9.00 (brs, 1H, NH); <sup>13</sup>C NMR (100 MHz, CDCl<sub>3</sub>, 60 °C):  $\delta$  14.9 (CH<sub>3</sub>), 21.4 (CH<sub>3</sub>), 21.4 (CH<sub>3</sub>), 21.5 (CH<sub>3</sub>), 50.5 (CH), 56.7 (CH), 64.9 (CH<sub>2</sub>), 116.9 (CH), 123.0 (CH), 127.3 (CH), 129.4 (CH), 129.9 (CH), 131.7 (C), 136.7 (C), 137.9 (C), 138.4 (C), 143.4 (C); HRMS (FAB) calcd for C<sub>20</sub>H<sub>29</sub>N<sub>2</sub>O<sub>3</sub>S [M+H]<sup>+</sup> 377.1893, found 377.1903.

To a solution of **2m'** (37.5 mg, 0.10 mmol) and PPh<sub>3</sub> (39.3 mg, 0.15 mmol) in toluene (1.0 mL) was added a solution of DEAD in toluene (2.2 M, 68  $\mu$ L, 0.15 mmol) dropwise at room temperature under Ar atmosphere. After stirring for 6 h, the whole mixture was evaporated in vacuo to furnish the crude product, which was purified by column chromatography (silica gel, 6:1 *n*-hexane/AcOEt) to give **15** (33.2 mg, 92%) as a colorless oil:  $[\alpha]_D^{20} = -42.9$  (*c* 0.68, CHCl<sub>3</sub>); IR (KBr)  $\nu$  2971, 1508, 1341, 1160, 1090, 810 cm<sup>-1</sup>; <sup>1</sup>H NMR (400 MHz, CDCl<sub>3</sub>):  $\delta$  1.00 (d, *J* = 6.4 Hz, 3H, CH(CH<sub>3</sub>)<sub>2</sub>), 1.10 (d, *J* = 6.4 Hz, 3H, CH(CH<sub>3</sub>)<sub>2</sub>), 1.13 (d, *J* = 6.4 Hz, 3H, CH(CH<sub>3</sub>)CH<sub>2</sub>), 2.20 (s, 3H, ArCH<sub>3</sub>), 2.39 (s, 3H, ArCH<sub>3</sub>), 3.50 (dd, *J* = 12.8, 4.4 Hz, 1H, CH(CH<sub>3</sub>)CHHO), 3.53–3.57 (m, 1H, CH(CH<sub>3</sub>)CHHO) 3.74 (septet, *J* = 6.4 Hz, 1H, CH(CH<sub>3</sub>)<sub>2</sub>), 3.89 (dd, *J* = 12.8, 5.2 Hz, 1H, CH(CH<sub>3</sub>)CHHO), 6.64 (d, *J* = 8.0 Hz, 1H, ArH), 6.79 (dd, *J* = 8.0, 1.6 Hz, 1H, ArH), 7.23–7.25 (m, 3H, ArH), 7.64 (d, *J*

= 8.0 Hz, 2H, *ArH*);  $^{13}\text{C}$  NMR (100 MHz,  $\text{CDCl}_3$ ):  $\delta$  19.6 ( $\text{CH}_3$ ), 19.9 ( $\text{CH}_3$ ), 20.8 ( $\text{CH}_3$ ), 21.4 ( $\text{CH}_3$ ), 46.3 ( $\text{CH}$ ), 49.6 ( $\text{CH}$ ), 50.7 ( $\text{CH}_2$ ), 114.0 ( $\text{CH}$ ), 122.7 ( $\text{CH}$ ), 123.0 ( $\text{CH}$ ), 124.2 ( $\text{C}$ ), 125.2 ( $\text{C}$ ), 126.9 ( $\text{CH}$ ), 127.1 ( $\text{CH}$ ), 129.4 ( $\text{CH}$ ), 129.7 ( $\text{CH}$ ), 135.5 ( $\text{C}$ ), 138.0 ( $\text{C}$ ), 143.3 ( $\text{C}$ ); HRMS (FAB) calcd for  $\text{C}_{20}\text{H}_{26}\text{N}_2\text{O}_2\text{S}$   $[\text{M}]^+$  358.1715, found 358.1720.

## 11. Procedure for the synthesis of 1,5-benzodiazepine 16.

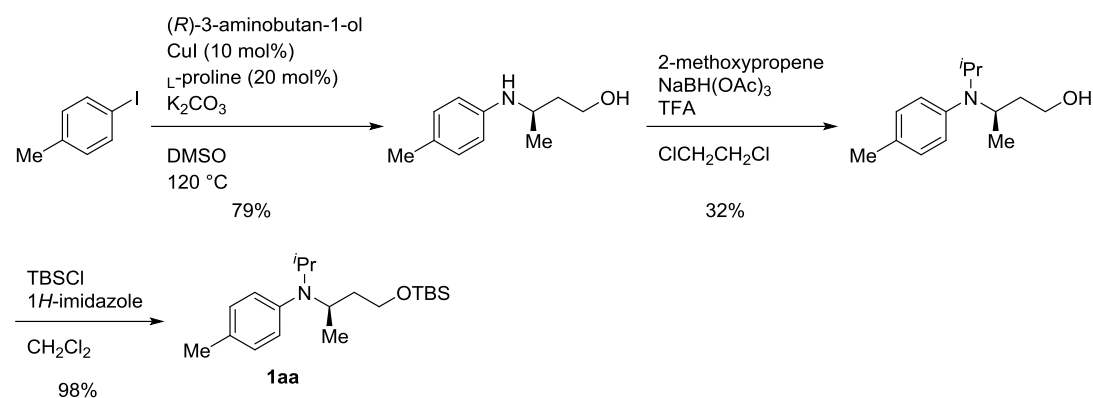

The mixture of 4-iodotoluene (2.04 g, 9.4 mmol), *(R)*-3-aminobutan-1-ol (1.00 g, 11 mmol), CuI (179 mg, 0.94 mmol, 10 mol%), L-proline (215 mg, 1.9 mmol, 20 mol%), and  $\text{K}_2\text{CO}_3$  (2.58 g, 19 mmol) in DMSO (5.6 mL) was heated to  $120\text{ }^\circ\text{C}$  under Ar atmosphere. After stirring for 12 h at the same temperature, the reaction was quenched with saturated aqueous  $\text{NH}_4\text{Cl}$ , and the mixture was extracted with AcOEt. The combined organic extracts were successively washed with brine, and dried over anhydrous  $\text{Na}_2\text{SO}_4$ . Filtration and evaporation in vacuo furnished the crude product, which was purified by column chromatography (silica gel, 1:1 *n*-hexane/AcOEt) to give *(R)*-*N*-(4-hydroxybutan-2-yl)-*p*-toluidine<sup>7</sup> (1.30 g, 79%) as a colorless oil:  $[\alpha]_{\text{D}}^{23} = -84.5$  (*c* 1.03,  $\text{CHCl}_3$ );  $^1\text{H}$  NMR (400 MHz,  $\text{CDCl}_3$ ):  $\delta$  1.19 (d,  $J = 6.0$  Hz, 3H,  $\text{CH}(\text{CH}_3)\text{CH}_2$ ), 1.72–1.78 (m, 2H,  $\text{CHCH}_2\text{CH}_2$ ), 2.24 (s, 3H, *ArH*), 2.93 (brs, 1H, OH), 3.64 (sextet,  $J = 6.3$  Hz, 1H,  $\text{CH}(\text{CH}_3)\text{CH}_2$ ), 3.82 (t,  $J = 6.0$  Hz, 2H,  $\text{CH}_2\text{CH}_2\text{O}$ ), 6.59 (d,  $J = 8.4$  Hz, 2H, *ArH*), 6.99 (d,  $J = 8.4$  Hz, 2H, *ArH*).

To a solution of *(R)*-*N*-(4-hydroxybutan-2-yl)-*p*-toluidine (538 mg, 3.0 mmol), 2-methoxypropene (0.42 mL, 4.5 mmol), and TFA (0.23 mL, 3.0 mmol) in 1,2-dichloroethane (9.0 mL) was added  $\text{NaBH}(\text{OAc})_3$  (954 mg, 4.5 mmol) at room temperature under Ar atmosphere. After stirring for 12 h, the reaction was quenched with saturated aqueous  $\text{NaHCO}_3$ , and the mixture was extracted with AcOEt. The combined organic extracts were successively washed with brine, and dried over anhydrous  $\text{Na}_2\text{SO}_4$ . Filtration and evaporation in vacuo furnished the crude product, which was purified by column chromatography (silica gel, 2:1 *n*-hexane/AcOEt) to give *(R)*-*N*-isopropyl-*N*-(4-hydroxybutan-2-yl)-*p*-toluidine (215 mg, 32%) as a colorless oil:  $[\alpha]_{\text{D}}^{23} = -102.7$  (*c* 1.02,  $\text{CHCl}_3$ ); IR (KBr)  $\nu$  3323, 2967, 1616,

1515, 1286, 1181, 1053, 807  $\text{cm}^{-1}$ ;  $^1\text{H}$  NMR (400 MHz,  $\text{CDCl}_3$ ):  $\delta$  1.12 (d,  $J = 6.8$  Hz, 3H,  $\text{CH}(\text{CH}_3)\text{CH}_2$ ), 1.13 (d,  $J = 6.4$  Hz, 3H,  $\text{CH}(\text{CH}_3)_2$ ), 1.14 (d,  $J = 6.4$  Hz, 3H,  $\text{CH}(\text{CH}_3)_2$ ), 1.58 (ddd,  $J = 14.4, 10.0, 4.4$  Hz, 1H,  $\text{CHCHHCH}_2$ ), 1.81 (ddd,  $J = 14.4, 8.0, 5.2$  Hz, 1H,  $\text{CHCHHCH}_2$ ), 2.29 (s, 3H,  $\text{ArCH}_3$ ), 3.61–3.92 (m, 4H,  $\text{CH}(\text{CH}_3)_2$ ,  $\text{CH}(\text{CH}_3)\text{CH}_2\text{CH}_2\text{O}$ ), 6.98 (d,  $J = 8.4$  Hz, 2H,  $\text{ArH}$ ), 7.05 (d,  $J = 8.4$  Hz, 2H,  $\text{ArH}$ );  $^{13}\text{C}$  NMR (100 MHz,  $\text{CDCl}_3$ ):  $\delta$  18.5 ( $\text{CH}_3$ ), 20.6 ( $\text{CH}_3$ ), 21.1 ( $\text{CH}_3$ ), 22.3 ( $\text{CH}_3$ ), 36.4 ( $\text{CH}_2$ ), 48.9 ( $\text{CH}$ ), 52.6 ( $\text{CH}$ ), 62.1 ( $\text{CH}_2$ ), 124.6 ( $\text{CH}$ ), 128.9 ( $\text{CH}$ ), 131.5 (C), 144.3 (C); HRMS (FAB) calcd for  $\text{C}_{14}\text{H}_{24}\text{NO}$   $[\text{M}+\text{H}]^+$  222.1852, found 222.1865.

To a solution of (*R*)-*N*-isopropyl-*N*-(4-hydroxypropan-2-yl)-*p*-toluidine (177 mg, 0.80 mmol) and 1*H*-imidazole (81.7 mg, 1.2 mmol) in  $\text{CH}_2\text{Cl}_2$  (4.0 mL) was added TBSCl (181 mg, 1.2 mmol) at room temperature under Ar atmosphere. After stirring for 1 h, the reaction was quenched with water, and the mixture was extracted with  $\text{CH}_2\text{Cl}_2$ . The combined organic extracts were dried over anhydrous  $\text{Na}_2\text{SO}_4$ . Filtration and evaporation in vacuo furnished the crude product, which was purified by column chromatography (silica gel, 10:1 *n*-hexane/AcOEt) to give **1aa** (264 mg, 98%) as a colorless oil:  $[\alpha]_{\text{D}}^{23} = -16.7$  (*c* 1.03,  $\text{CHCl}_3$ ); IR (KBr)  $\nu$  2957, 1617, 1516, 1255, 1098, 835  $\text{cm}^{-1}$ ;  $^1\text{H}$  NMR (400 MHz,  $\text{CDCl}_3$ ):  $\delta$  0.02 (s, 3H,  $\text{SiCH}_3$ ), 0.03 (s, 3H,  $\text{SiCH}_3$ ), 0.89 (s, 9H,  $\text{Si}^t\text{Bu}$ ), 1.18–1.20 (m, 9H,  $\text{CH}(\text{CH}_3)\text{CH}_2$  and  $\text{CH}(\text{CH}_3)_2$ ), 1.65 (ddt,  $J = 14.0, 8.0, 6.0$  Hz, 1H,  $\text{CHCHHCH}_2$ ), 1.89 (dt,  $J = 14.0, 6.0$  Hz, 1H,  $\text{CHCHHCH}_2$ ), 2.25 (s, 3H,  $\text{ArCH}_3$ ), 3.57–3.74 (m, 4H,  $\text{CH}(\text{CH}_3)_2$ ,  $\text{CH}(\text{CH}_3)\text{CH}_2\text{CH}_2\text{O}$ ), 6.81 (d,  $J = 8.4$  Hz, 2H,  $\text{ArH}$ ), 6.98 (d,  $J = 8.4$  Hz, 2H,  $\text{ArH}$ );  $^{13}\text{C}$  NMR (100 MHz,  $\text{CDCl}_3$ ):  $\delta$  -5.41 ( $\text{CH}_3$ ), -5.36 ( $\text{CH}_3$ ), 18.3 (C), 19.2 ( $\text{CH}_3$ ), 20.4 ( $\text{CH}_3$ ), 21.6 ( $\text{CH}_3$ ), 21.7 ( $\text{CH}_3$ ), 25.9 ( $\text{CH}_3$ ), 38.7 ( $\text{CH}_2$ ), 48.3 ( $\text{CH}$ ), 48.7 ( $\text{CH}$ ), 60.9 ( $\text{CH}_2$ ), 119.6 ( $\text{CH}$ ), 127.4 ( $\text{CH}$ ), 129.0 (C), 145.9 (C); HRMS (FAB) calcd for  $\text{C}_{20}\text{H}_{38}\text{NOSi}$   $[\text{M}+\text{H}]^+$  336.2717, found 336.2722.

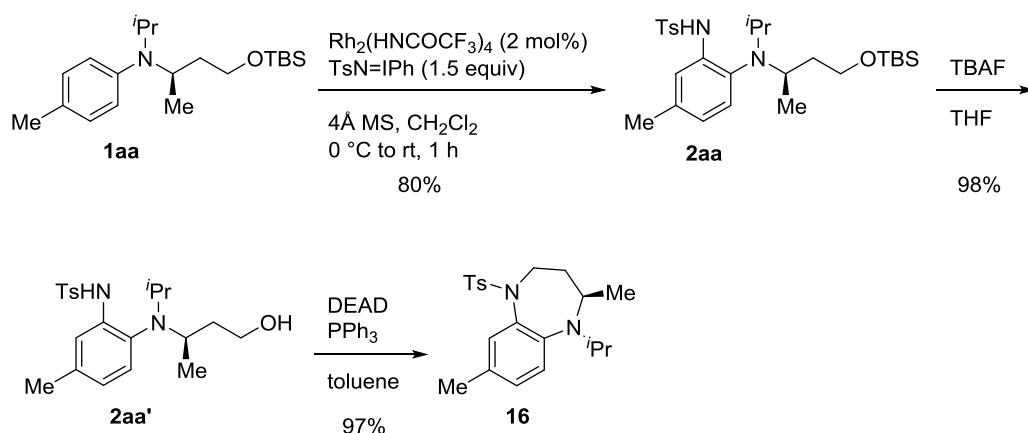

$\text{TsN=IPh}$  (224 mg, 0.60 mmol) was added to a stirred mixture of **1aa** (134 mg, 0.40 mmol),  $\text{Rh}_2(\text{HNCOCF}_3)_4$  (5.2 mg, 0.008 mmol, 2 mol %) and 4Å MS (powder, 160 mg) in

CH<sub>2</sub>Cl<sub>2</sub> (4.0 mL) at 0 °C under Ar atmosphere. After stirring at room temperature for 1 h, the whole mixture was filtered through a pad of Celite, and the filtrate was evaporated in vacuo to furnish the crude product, which was purified by column chromatography (silica gel, 8:1 *n*-hexane/AcOEt) to give diaminobenzene **2aa** (161 mg, 80%) as a colorless oil:  $[\alpha]_D^{23} = +3.75$  (*c* 0.99, CHCl<sub>3</sub>); IR (KBr)  $\nu$  3210, 2956, 1504, 1382, 1169, 1092, 835 cm<sup>-1</sup>; <sup>1</sup>H NMR (400 MHz, CDCl<sub>3</sub>, 60 °C):  $\delta$  0.02 (s, 3H, SiCH<sub>3</sub>), 0.03 (s, 3H, SiCH<sub>3</sub>), 0.86–0.89 (m, 18H, Si<sup>t</sup>Bu, CH(CH<sub>3</sub>)CH<sub>2</sub> and CH(CH<sub>3</sub>)<sub>2</sub>), 1.09 (ddd, *J* = 18.0, 9.6, 4.8 Hz, 1H, CHCHHCH<sub>2</sub>), 1.73–1.81 (m, 1H, CHCHHCH<sub>2</sub>), 2.28 (s, 3H, ArCH<sub>3</sub>), 2.35 (s, 3H, ArCH<sub>3</sub>), 3.32 (septet, *J* = 6.4 Hz, 1H, CH(CH<sub>3</sub>)<sub>2</sub>), 3.40 (ddq, *J* = 16.0, 6.4, 3.2 Hz, 1H, CH(CH<sub>3</sub>)CH<sub>2</sub>), 3.48 (ddd, *J* = 10.4, 8.4, 4.8 Hz, 1H, CH<sub>2</sub>CHHO), 3.56 (ddd, *J* = 10.4, 6.0, 4.8 Hz, 1H, CH<sub>2</sub>CHHO), 6.71 (d, *J* = 8.0 Hz, 1H, ArH), 6.96 (d, *J* = 8.0 Hz, 1H, ArH), 7.20 (d, *J* = 8.0 Hz, 2H, ArH), 7.39 (s, 1H, ArH), 7.79 (d, *J* = 8.0 Hz, 2H, ArH), 8.51 (brs, 1H, NH); <sup>13</sup>C NMR (100 MHz, CDCl<sub>3</sub>, 60 °C):  $\delta$  -5.4 (CH<sub>3</sub>), -5.3 (CH<sub>3</sub>), 17.5 (CH<sub>3</sub>), 18.3 (C), 21.0 (CH<sub>3</sub>), 21.4 (CH<sub>3</sub>), 21.4 (CH<sub>3</sub>), 26.0 (CH<sub>3</sub>), 36.9 (CH<sub>2</sub>), 50.4 (CH), 51.7 (CH), 60.6 (CH<sub>2</sub>), 116.2 (CH), 123.1 (CH), 127.3 (CH), 128.4 (CH), 128.5 (C), 129.5 (CH), 132.5 (C), 136.4 (C), 137.8 (C), 143.5 (C); HRMS (FAB) calcd for C<sub>27</sub>H<sub>45</sub>N<sub>2</sub>O<sub>3</sub>SSi [M+H]<sup>+</sup> 505.2915, found 505.2927.

To a solution of **2aa** (126 mg, 0.25 mmol) in THF (2.5 mL) was added a solution of TBAF in THF (1.0 M, 0.38 mL, 0.38 mmol) at room temperature under Ar atmosphere. After stirring for 1 h, the reaction was quenched with water, and the mixture was extracted with AcOEt. The combined organic extracts were successively washed with brine, and dried over anhydrous Na<sub>2</sub>SO<sub>4</sub>. Filtration and evaporation in vacuo furnished the crude product, which was purified by column chromatography (silica gel, 3:2 *n*-hexane/AcOEt) to give **2aa'** (95.2 mg, 98%) as a colorless oil:  $[\alpha]_D^{23} = -12.7$  (*c* 0.42, CHCl<sub>3</sub>); IR (KBr)  $\nu$  3212, 2970, 1504, 1370, 1167, 1090, 967, 814 cm<sup>-1</sup>; <sup>1</sup>H NMR (400 MHz, CDCl<sub>3</sub>, 60 °C):  $\delta$  0.85 (d, *J* = 6.4 Hz, 3H, CH(CH<sub>3</sub>)<sub>2</sub>), 0.90 (d, *J* = 6.4 Hz, 3H, CH(CH<sub>3</sub>)<sub>2</sub>), 0.94 (d, *J* = 6.4 Hz, 3H, CH(CH<sub>3</sub>)CH<sub>2</sub>), 1.25 (ddd, *J* = 19.6, 9.6, 5.6 Hz, 1H, CHCHHCH<sub>2</sub>), 1.68–1.76 (m, 1H, CHCHHCH<sub>2</sub>), 2.28 (s, 3H, ArCH<sub>3</sub>), 2.35 (s, 3H, ArCH<sub>3</sub>), 3.36 (m, 2H, CH(CH<sub>3</sub>)<sub>2</sub> and CH(CH<sub>3</sub>)CH<sub>2</sub>), 3.54–3.60 (m, 1H, CH<sub>2</sub>CHHO), 3.56 (dt, *J* = 12.0, 6.0 Hz, 1H, CH<sub>2</sub>CHHO), 5.03 (brs, 1H, OH), 6.72 (d, *J* = 8.0 Hz, 1H, ArH), 6.98 (d, *J* = 8.0 Hz, 1H, ArH), 7.21 (d, *J* = 8.0 Hz, 2H, ArH), 7.39 (s, 1H, ArH), 7.79 (d, *J* = 8.0 Hz, 2H, ArH); <sup>13</sup>C NMR (100 MHz, CDCl<sub>3</sub>, 60 °C):  $\delta$  17.8 (CH<sub>3</sub>), 21.0 (CH<sub>3</sub>), 21.4 (CH<sub>3</sub>), 21.4 (CH<sub>3</sub>), 37.0 (CH<sub>2</sub>), 50.0 (CH), 52.3 (CH), 60.5 (CH<sub>2</sub>), 116.4 (CH), 123.1 (CH), 127.2 (CH), 128.7 (CH), 129.5 (CH), 132.3 (C), 136.5 (C), 137.8 (C), 137.8 (C), 143.5 (C); HRMS (FAB) calcd for C<sub>21</sub>H<sub>31</sub>N<sub>2</sub>O<sub>3</sub>S [M+H]<sup>+</sup> 391.2050, found 391.2064.

To a solution of **2aa'** (52.7 mg, 0.14 mmol) and PPh<sub>3</sub> (53.1 mg, 0.20 mmol) in toluene (5.4 mL) was added a solution of DEAD in toluene (2.2 M, 92  $\mu$ L, 0.20 mmol)

dropwise at room temperature under Ar atmosphere. After stirring for 6 h, the whole mixture was evaporated in vacuo to furnish the crude product, which was purified by column chromatography (silica gel, 6:1 *n*-hexane/AcOEt) to give **16** (48.8 mg, 97%) as a colorless solid: mp 120–121 °C;  $[\alpha]_{\text{D}}^{24} = -177.8$  (*c* 1.03, CHCl<sub>3</sub>); IR (KBr)  $\nu$  2967, 1504, 1343, 1160, 1091, 981, 812 cm<sup>-1</sup>; <sup>1</sup>H NMR (400 MHz, CDCl<sub>3</sub>, 60 °C):  $\delta$  0.54 (d, *J* = 6.4 Hz, 3H, CH(CH<sub>3</sub>)<sub>2</sub>), 0.74 (d, *J* = 6.4 Hz, 3H, CH(CH<sub>3</sub>)CH<sub>2</sub>), 1.04 (d, *J* = 6.4 Hz, 3H, CH(CH<sub>3</sub>)<sub>2</sub>), 1.26 (dddd, *J* = 14.4, 7.6, 7.6, 2.0 Hz, 1H, CHCHHCH<sub>2</sub>), 1.86 (dddd, *J* = 14.4, 9.2, 5.2, 2.8 Hz, 1H, CHCHHCH<sub>2</sub>), 2.29 (s, 3H, ArCH<sub>3</sub>), 2.36 (s, 3H, ArCH<sub>3</sub>), 3.32 (septet, *J* = 6.4 Hz, 1H, CH(CH<sub>3</sub>)<sub>2</sub>) 3.37 (dd, *J* = 12.0, 6.4 Hz, 1H, CH(CH<sub>3</sub>)CH<sub>2</sub>), 3.44 (ddd, *J* = 12.0, 9.2, 2.0 Hz, 1H, CH<sub>2</sub>CHHN), 4.00 (ddd, *J* = 12.0, 8.0, 2.8 Hz, 1H, CH<sub>2</sub>CHHN), 6.84 (d, *J* = 8.0 Hz, 1H, ArH), 6.97 (dd, *J* = 8.0, 2.0 Hz, 1H, ArH), 7.16 (d, *J* = 8.0 Hz, 2H, ArH), 7.28 (d, *J* = 2.0 Hz, 1H, ArH), 7.55 (d, *J* = 8.0 Hz, 2H, ArH); <sup>13</sup>C NMR (100 MHz, CDCl<sub>3</sub>, 60 °C):  $\delta$  15.1 (CH<sub>3</sub>), 20.6 (CH<sub>3</sub>), 20.9 (CH<sub>3</sub>), 21.3 (CH<sub>3</sub>), 21.9 (CH<sub>3</sub>), 34.0 (CH<sub>2</sub>), 45.0 (CH<sub>2</sub>), 48.2 (CH), 49.2 (CH), 124.3 (CH), 127.6 (CH), 128.2 (CH), 129.1 (CH), 131.1 (CH), 132.3 (C), 133.7 (C), 138.6 (C), 141.6 (C), 142.5 (C); HRMS (FAB) calcd for C<sub>21</sub>H<sub>29</sub>N<sub>2</sub>O<sub>2</sub>S [M+H]<sup>+</sup> 373.1944, found 373.1951.

## References

1. (a) C. G. Espino, K. W. Fiori, M. Kim, J. Du Bois, *J. Am. Chem. Soc.* **2004**, *126*, 15378–15379. (b) K. P. Kornecki, J. F. Berry, *Eur. J. Inorg. Chem.* **2012**, 562–568.
2. (a) K. Guthikonda, J. Du Bois, *J. Am. Chem. Soc.* **2002**, *124*, 13672–13673. (b) E. Martinand-Lurin, R. Gruber, P. Retailleau, P. Fleurat-Lessard, P. Dauban, *J. Org. Chem.* **2015**, *80*, 1414–1426.
3. A. K. Mishra, M. M. Olmstead, J. J. Ellison, P. P. Power, *Inorg. Chem.* **1995**, *34*, 3210–3214.
4. T. J. Reddy, M. Leclair, M. Proulx, *Synthesis* **2005**, 583–586.
5. D. Wang, M. R. Talipov, M. V. Ivanov, R. Rathore, *J. Am. Chem. Soc.* **2016**, *138*, 16337–16344.
6. J.-G. Cao, H.-M. Cao, Y.-J. Lin, D.-P. Liang, H.-F. Duan, S.-Y. Han, X.-Z. Zhao, *Chemical Research in Chinese Universities*, **2011**, *27*, 780–783.
7. G. Bartoli, C. Cimarelli, E. Marcantoni, G. Palmieri, M. Petrini, *J. Org. Chem.* **1994**, *59*, 5328–5335.
